# Supplementary material for: Myeloma cells can corrupt senescent mesenchymal stromal cells and impair their anti-tumor activity
Source: PubMed Central journal article supplement (PMC4741840; doi:10.18632/oncotarget.5430), 2015-10-16
Supplement: oncotarget-06-39482-s004.pdf [file oncotarget-06-39482-s004.pdf]

Now includes comprehensive GO annotations directly imported from the GO database

Analysis Summary: Please report in publication [?](#)

**Analysis Type:** PANTHER Overrepresentation Test (release 20150430)

---

**Annotation Version and Release Date:** PANTHER version 10.0 Released 2015-05-15

---

**Analyzed List:** **Naïve secretomes** [Change](#)

---

**Reference List:** Homo sapiens (all genes in database) [Change](#)

---

**Annotation Data Set:**

---

Use the Bonferroni correction for multiple testing [?](#)

Results [?](#)

|               | Reference list        | Client Text Box Input |
|---------------|-----------------------|-----------------------|
| Mapped IDs:   | <a href="#">20814</a> | <a href="#">101</a>   |
| Unmapped IDs: | <a href="#">0</a>     | <a href="#">0</a>     |

[Export results](#) View:

Displaying only results with  $P < 0.05$ ; [click here to display all results](#)

| PANTHER GO-Slim Biological Process        | Homo sapiens (REF)   |                    | Client Text Box Input |                 |     |          |
|-------------------------------------------|----------------------|--------------------|-----------------------|-----------------|-----|----------|
|                                           | #                    | #                  | expected              | Fold Enrichment | +/- | P value  |
| <a href="#">translation</a>               | <a href="#">435</a>  | <a href="#">12</a> | 2.11                  | > 5             | +   | 3.26E-04 |
| <a href="#">proteolysis</a>               | <a href="#">719</a>  | <a href="#">12</a> | 3.49                  | 3.44            | +   | 4.38E-02 |
| <a href="#">protein metabolic process</a> | <a href="#">2692</a> | <a href="#">36</a> | 13.06                 | 2.76            | +   | 1.18E-06 |
| <a href="#">metabolic process</a>         | <a href="#">8247</a> | <a href="#">62</a> | 40.02                 | 1.55            | +   | 1.81E-03 |
| <a href="#">primary metabolic process</a> | <a href="#">6825</a> | <a href="#">51</a> | 33.12                 | 1.54            | +   | 3.83E-02 |
| Unclassified                              | <a href="#">8629</a> | <a href="#">13</a> | 41.87                 | .31             | -   | 0.00E00  |

Now includes comprehensive GO annotations directly imported from the GO database

Analysis Summary: Please report in publication [?](#)

**Analysis Type:** PANTHER Overrepresentation Test (release 20150430)

---

**Annotation Version and Release Date:** PANTHER version 10.0 Released 2015-05-15

---

**Analyzed List:**  [Change](#)

---

**Reference List:**  [Change](#)

---

**Annotation Data Set:**  [?](#)

---

Use the Bonferroni correction for multiple testing [?](#)

## Results [?](#)

|               | Reference list        | Client Text Box Input |
|---------------|-----------------------|-----------------------|
| Mapped IDs:   | <a href="#">20814</a> | <a href="#">101</a>   |
| Unmapped IDs: | <a href="#">0</a>     | <a href="#">0</a>     |

[Export results](#)

View:

Displaying only results with  $P < 0.05$ ; [click here to display all results](#)

| PANTHER GO-Slim Molecular Function                     | Homo sapiens (REF)    |                    | Client Text Box Input |                 |     |          |
|--------------------------------------------------------|-----------------------|--------------------|-----------------------|-----------------|-----|----------|
|                                                        | #                     | #                  | expected              | Fold Enrichment | +/- | P value  |
| <a href="#">actin binding</a>                          | <a href="#">176</a>   | <a href="#">7</a>  | .85                   | > 5             | +   | 4.49E-03 |
| <a href="#">cytoskeletal protein binding</a>           | <a href="#">251</a>   | <a href="#">7</a>  | 1.22                  | > 5             | +   | 4.01E-02 |
| <a href="#">calcium ion binding</a>                    | <a href="#">449</a>   | <a href="#">11</a> | 2.18                  | > 5             | +   | 2.12E-03 |
| <a href="#">structural molecule activity</a>           | <a href="#">1034</a>  | <a href="#">21</a> | 5.02                  | 4.19            | +   | 3.79E-06 |
| <a href="#">structural constituent of cytoskeleton</a> | <a href="#">663</a>   | <a href="#">12</a> | 3.22                  | 3.73            | +   | 1.58E-02 |
| Unclassified                                           | <a href="#">10020</a> | <a href="#">21</a> | 48.62                 | .43             | -   | 0.00E00  |

Now includes comprehensive GO annotations directly imported from the GO database

Analysis Summary: Please report in publication [?](#)

**Analysis Type:** PANTHER Overrepresentation Test (release 20150430)

---

**Annotation Version and Release Date:** PANTHER version 10.0 Released 2015-05-15

---

**Analyzed List:**  [Change](#)

---

**Reference List:**  [Change](#)

---

**Annotation Data Set:**

---

Use the Bonferroni correction for multiple testing [?](#)

### Results [?](#)

|               | Reference list        | Client Text Box Input |
|---------------|-----------------------|-----------------------|
| Mapped IDs:   | <a href="#">20814</a> | <a href="#">101</a>   |
| Unmapped IDs: | <a href="#">0</a>     | <a href="#">0</a>     |

[Export results](#)

View:

Displaying only results with  $P < 0.05$ ; [click here to display all results](#)

| PANTHER Protein Class                             | Homo sapiens (REF)   |                    | Client Text Box Input |                 |     |          |
|---------------------------------------------------|----------------------|--------------------|-----------------------|-----------------|-----|----------|
|                                                   | #                    | #                  | expected              | Fold Enrichment | +/- | P value  |
| <a href="#">ribosomal protein</a>                 | <a href="#">225</a>  | <a href="#">8</a>  | 1.09                  | > 5             | +   | 3.13E-03 |
| <a href="#">actin family cytoskeletal protein</a> | <a href="#">395</a>  | <a href="#">12</a> | 1.92                  | > 5             | +   | 1.10E-04 |
| <a href="#">cytoskeletal protein</a>              | <a href="#">806</a>  | <a href="#">14</a> | 3.91                  | 3.58            | +   | 7.41E-03 |
| Unclassified                                      | <a href="#">9675</a> | <a href="#">20</a> | 46.95                 | .43             | -   | 0.00E00  |

Now includes comprehensive GO annotations directly imported from the GO database

Analysis Summary: Please report in publication [?](#)

|                                                                                                          |                        |
|----------------------------------------------------------------------------------------------------------|------------------------|
| <b>Analysis Type:</b> PANTHER Overrepresentation Test (release 20150430)                                 |                        |
| <b>Annotation Version and Release Date:</b> PANTHER version 10.0 Released 2015-05-15                     |                        |
| <b>Analyzed List:</b> <b>Primed secretomes</b>                                                           | <a href="#">Change</a> |
| <b>Reference List:</b> Homo sapiens (all genes in database)                                              | <a href="#">Change</a> |
| <b>Annotation Data Set:</b> <input type="text" value="PANTHER GO-Slim Biological Process"/>              |                        |
| <input checked="" type="checkbox"/> Use the Bonferroni correction for multiple testing <a href="#">?</a> |                        |

### Results [?](#)

|               | Reference list        | Client Text Box Input |
|---------------|-----------------------|-----------------------|
| Mapped IDs:   | <a href="#">20814</a> | <a href="#">55</a>    |
| Unmapped IDs: | <a href="#">0</a>     | <a href="#">0</a>     |

[Export results](#)

 View: 

Displaying only results with P<0.05; [click here to display all results](#)

| <a href="#">PANTHER GO-Slim Biological Process</a> | <a href="#">Homo sapiens (REF)</a> |                    | <a href="#">Client Text Box Input</a> |                                 |                     |                         |
|----------------------------------------------------|------------------------------------|--------------------|---------------------------------------|---------------------------------|---------------------|-------------------------|
|                                                    | #                                  | #                  | <a href="#">expected</a>              | <a href="#">Fold Enrichment</a> | <a href="#">+/-</a> | <a href="#">P value</a> |
| <a href="#">cellular component morphogenesis</a>   | <a href="#">478</a>                | <a href="#">9</a>  | 1.26                                  | > 5                             | +                   | 9.60E-04                |
| <a href="#">anatomical structure morphogenesis</a> | <a href="#">596</a>                | <a href="#">9</a>  | 1.57                                  | > 5                             | +                   | 5.51E-03                |
| <a href="#">developmental process</a>              | <a href="#">2456</a>               | <a href="#">17</a> | 6.49                                  | 2.62                            | +                   | 2.94E-02                |
| Unclassified                                       | <a href="#">8629</a>               | <a href="#">16</a> | 22.80                                 | .70                             | -                   | 0.00E00                 |



Now includes comprehensive GO annotations directly imported from the GO database

Analysis Summary: Please report in publication [?](#)

**Analysis Type:** PANTHER Overrepresentation Test (release 20150430)

---

**Annotation Version and Release Date:** PANTHER version 10.0 Released 2015-05-15

---

**Analyzed List:**  [Change](#)

---

**Reference List:**  [Change](#)

---

**Annotation Data Set:**  [?](#)

---

Use the Bonferroni correction for multiple testing [?](#)

Results [?](#)

|               | Reference list        | Client Text Box Input |
|---------------|-----------------------|-----------------------|
| Mapped IDs:   | <a href="#">20814</a> | <a href="#">55</a>    |
| Unmapped IDs: | <a href="#">0</a>     | <a href="#">0</a>     |

[Export results](#) View:

Displaying only results with  $P < 0.05$ ; [click here to display all results](#)

| <a href="#">PANTHER GO-Slim Molecular Function</a>     | <a href="#">Homo sapiens (REF)</a> |                    | <a href="#">Client Text Box Input</a> |                                 |                     |                         |
|--------------------------------------------------------|------------------------------------|--------------------|---------------------------------------|---------------------------------|---------------------|-------------------------|
|                                                        | #                                  | #                  | <a href="#">expected</a>              | <a href="#">Fold Enrichment</a> | <a href="#">+/-</a> | <a href="#">P value</a> |
| <a href="#">structural constituent of cytoskeleton</a> | <a href="#">663</a>                | <a href="#">11</a> | 1.75                                  | > 5                             | +                   | 1.89E-04                |
| <a href="#">structural molecule activity</a>           | <a href="#">1034</a>               | <a href="#">16</a> | 2.73                                  | > 5                             | +                   | 1.08E-06                |
| <a href="#">protein binding</a>                        | <a href="#">2819</a>               | <a href="#">18</a> | 7.45                                  | 2.42                            | +                   | 3.73E-02                |
| Unclassified                                           | <a href="#">10020</a>              | <a href="#">20</a> | 26.48                                 | .76                             | -                   | 0.00E00                 |

Now includes comprehensive GO annotations directly imported from the GO database

Analysis Summary: Please report in publication [?](#)

**Analysis Type:** PANTHER Overrepresentation Test (release 20150430)

---

**Annotation Version and Release Date:** PANTHER version 10.0 Released 2015-05-15

---

**Analyzed List:**  [Change](#)

---

**Reference List:**  [Change](#)

---

**Annotation Data Set:**

---

Use the Bonferroni correction for multiple testing [?](#)

**Results** [?](#)

|               | Reference list        | Client Text Box Input |
|---------------|-----------------------|-----------------------|
| Mapped IDs:   | <a href="#">20814</a> | <a href="#">55</a>    |
| Unmapped IDs: | <a href="#">0</a>     | <a href="#">0</a>     |

[Export results](#) View:

Displaying only results with P<0.05; [click here to display all results](#)

| PANTHER Protein Class                             | Homo sapiens (REF)   |                    | Client Text Box Input |                 |     |          |
|---------------------------------------------------|----------------------|--------------------|-----------------------|-----------------|-----|----------|
|                                                   | #                    | #                  | expected              | Fold Enrichment | +/- | P value  |
| <a href="#">actin family cytoskeletal protein</a> | <a href="#">395</a>  | <a href="#">7</a>  | 1.04                  | > 5             | +   | 1.64E-02 |
| <a href="#">cytoskeletal protein</a>              | <a href="#">806</a>  | <a href="#">12</a> | 2.13                  | > 5             | +   | 2.13E-04 |
| Unclassified                                      | <a href="#">9675</a> | <a href="#">16</a> | 25.57                 | .63             | -   | 0.00E00  |
