# Supplementary material for: Myeloma cells can corrupt senescent mesenchymal stromal cells and impair their anti-tumor activity
Source: PubMed Central journal article supplement (PMC4741840; doi:10.18632/oncotarget.5430), 2015-10-16
Supplement: oncotarget-06-39482-s005.pdf [file oncotarget-06-39482-s005.pdf]

## Functional Annotation Clustering

[Help and Manual](#)

Current Gene List: Naive secretomes

Current Background: Homo sapiens

101 DAVID IDs

Options    Classification Stringency

44 Cluster(s)

 [Download File](#)

| Annotation Cluster 1     |                 | Enrichment Score: 5.67                                                 |    |    | Count | P_Value | Benjamini |
|--------------------------|-----------------|------------------------------------------------------------------------|-------------------------------------------------------------------------------------|---------------------------------------------------------------------------------------|-------|---------|-----------|
| <input type="checkbox"/> | SP_PIR_KEYWORDS | <a href="#">protein biosynthesis</a>                                   | <a href="#">RT</a>                                                                  |      | 14    | 1.7E-11 | 2.0E-9    |
| <input type="checkbox"/> | GOTERM_BP_FAT   | <a href="#">translational elongation</a>                               | <a href="#">RT</a>                                                                  |      | 12    | 3.1E-11 | 3.1E-8    |
| <input type="checkbox"/> | GOTERM_MF_FAT   | <a href="#">structural molecule activity</a>                           | <a href="#">RT</a>                                                                  |      | 22    | 1.8E-9  | 4.9E-7    |
| <input type="checkbox"/> | SP_PIR_KEYWORDS | <a href="#">ribosome</a>                                               | <a href="#">RT</a>                                                                  |      | 9     | 4.1E-9  | 3.2E-7    |
| <input type="checkbox"/> | GOTERM_CC_FAT   | <a href="#">cytosolic ribosome</a>                                     | <a href="#">RT</a>                                                                  |      | 9     | 1.0E-7  | 2.0E-5    |
| <input type="checkbox"/> | GOTERM_BP_FAT   | <a href="#">translation</a>                                            | <a href="#">RT</a>                                                                  |      | 14    | 1.3E-7  | 2.2E-5    |
| <input type="checkbox"/> | GOTERM_CC_FAT   | <a href="#">cytosolic small ribosomal subunit</a>                      | <a href="#">RT</a>                                                                  |      | 7     | 3.5E-7  | 3.4E-5    |
| <input type="checkbox"/> | GOTERM_CC_FAT   | <a href="#">cytosol</a>                                                | <a href="#">RT</a>                                                                  |      | 27    | 1.1E-6  | 7.3E-5    |
| <input type="checkbox"/> | GOTERM_CC_FAT   | <a href="#">cytosolic part</a>                                         | <a href="#">RT</a>                                                                  |      | 10    | 1.3E-6  | 6.3E-5    |
| <input type="checkbox"/> | GOTERM_CC_FAT   | <a href="#">ribosomal subunit</a>                                      | <a href="#">RT</a>                                                                  |      | 9     | 3.4E-6  | 1.1E-4    |
| <input type="checkbox"/> | GOTERM_CC_FAT   | <a href="#">small ribosomal subunit</a>                                | <a href="#">RT</a>                                                                  |      | 7     | 5.4E-6  | 1.5E-4    |
| <input type="checkbox"/> | SP_PIR_KEYWORDS | <a href="#">ribosomal protein</a>                                      | <a href="#">RT</a>                                                                  |      | 9     | 6.2E-6  | 2.5E-4    |
| <input type="checkbox"/> | SP_PIR_KEYWORDS | <a href="#">blocked amino end</a>                                      | <a href="#">RT</a>                                                                  |      | 7     | 8.4E-6  | 2.9E-4    |
| <input type="checkbox"/> | SP_PIR_KEYWORDS | <a href="#">ribonucleoprotein</a>                                      | <a href="#">RT</a>                                                                  |      | 10    | 1.5E-5  | 4.5E-4    |
| <input type="checkbox"/> | KEGG_PATHWAY    | <a href="#">Ribosome</a>                                               | <a href="#">RT</a>                                                                  |      | 8     | 1.6E-5  | 1.0E-3    |
| <input type="checkbox"/> | GOTERM_CC_FAT   | <a href="#">ribosome</a>                                               | <a href="#">RT</a>                                                                  |      | 10    | 2.2E-5  | 4.8E-4    |
| <input type="checkbox"/> | GOTERM_MF_FAT   | <a href="#">structural constituent of ribosome</a>                     | <a href="#">RT</a>                                                                  |     | 9     | 2.3E-5  | 2.0E-3    |
| <input type="checkbox"/> | GOTERM_CC_FAT   | <a href="#">ribonucleoprotein complex</a>                              | <a href="#">RT</a>                                                                  |    | 11    | 3.6E-3  | 4.9E-2    |
| <input type="checkbox"/> | GOTERM_MF_FAT   | <a href="#">RNA binding</a>                                            | <a href="#">RT</a>                                                                  |    | 7     | 3.9E-1  | 9.9E-1    |
| <input type="checkbox"/> | SP_PIR_KEYWORDS | <a href="#">rna-binding</a>                                            | <a href="#">RT</a>                                                                  |    | 3     | 7.8E-1  | 1.0E0     |
| Annotation Cluster 2     |                 | Enrichment Score: 3.4                                                  |  |  | Count | P_Value | Benjamini |
| <input type="checkbox"/> | SP_PIR_KEYWORDS | <a href="#">actin-binding</a>                                          | <a href="#">RT</a>                                                                  |    | 12    | 6.5E-8  | 3.9E-6    |
| <input type="checkbox"/> | GOTERM_BP_FAT   | <a href="#">regulation of actin cytoskeleton organization</a>          | <a href="#">RT</a>                                                                  |    | 9     | 8.1E-8  | 4.0E-5    |
| <input type="checkbox"/> | GOTERM_BP_FAT   | <a href="#">regulation of actin polymerization or depolymerization</a> | <a href="#">RT</a>                                                                  |    | 8     | 1.0E-7  | 3.3E-5    |
| <input type="checkbox"/> | GOTERM_BP_FAT   | <a href="#">regulation of actin filament-based process</a>             | <a href="#">RT</a>                                                                  |    | 9     | 1.1E-7  | 2.6E-5    |
| <input type="checkbox"/> | GOTERM_BP_FAT   | <a href="#">regulation of actin filament length</a>                    | <a href="#">RT</a>                                                                  |    | 8     | 1.3E-7  | 2.5E-5    |
| <input type="checkbox"/> | GOTERM_BP_FAT   | <a href="#">regulation of actin filament polymerization</a>            | <a href="#">RT</a>                                                                  |    | 7     | 1.0E-6  | 1.5E-4    |
| <input type="checkbox"/> | GOTERM_BP_FAT   | <a href="#">regulation of cytoskeleton organization</a>                | <a href="#">RT</a>                                                                  |    | 9     | 2.1E-6  | 2.6E-4    |
| <input type="checkbox"/> | GOTERM_CC_FAT   | <a href="#">actin cytoskeleton</a>                                     | <a href="#">RT</a>                                                                  |    | 12    | 3.1E-6  | 1.2E-4    |
| <input type="checkbox"/> | GOTERM_BP_FAT   | <a href="#">regulation of protein polymerization</a>                   | <a href="#">RT</a>                                                                  |    | 7     | 4.1E-6  | 4.5E-4    |
| <input type="checkbox"/> | GOTERM_BP_FAT   | <a href="#">regulation of organelle organization</a>                   | <a href="#">RT</a>                                                                  |    | 10    | 8.5E-6  | 8.4E-4    |
| <input type="checkbox"/> | GOTERM_CC_FAT   | <a href="#">Arp2/3 protein complex</a>                                 | <a href="#">RT</a>                                                                  |    | 4     | 1.2E-5  | 3.0E-4    |
| <input type="checkbox"/> | GOTERM_MF_FAT   | <a href="#">actin binding</a>                                          | <a href="#">RT</a>                                                                  |    | 12    | 1.7E-5  | 2.2E-3    |
| <input type="checkbox"/> | GOTERM_BP_FAT   | <a href="#">regulation of protein complex assembly</a>                 | <a href="#">RT</a>                                                                  |    | 7     | 2.1E-5  | 1.9E-3    |
| <input type="checkbox"/> | GOTERM_BP_FAT   | <a href="#">regulation of cellular component biogenesis</a>            | <a href="#">RT</a>                                                                  |    | 8     | 3.0E-5  | 2.5E-3    |
| <input type="checkbox"/> | SP_PIR_KEYWORDS | <a href="#">actin capping</a>                                          | <a href="#">RT</a>                                                                  |    | 4     | 1.2E-4  | 3.0E-3    |
| <input type="checkbox"/> | GOTERM_MF_FAT   | <a href="#">structural constituent of cytoskeleton</a>                 | <a href="#">RT</a>                                                                  |    | 6     | 1.7E-4  | 1.1E-2    |
| <input type="checkbox"/> | GOTERM_MF_FAT   | <a href="#">cytoskeletal protein binding</a>                           | <a href="#">RT</a>                                                                  |    | 13    | 2.0E-4  | 1.1E-2    |
| <input type="checkbox"/> | GOTERM_BP_FAT   | <a href="#">regulation of cellular component size</a>                  | <a href="#">RT</a>                                                                  |    | 9     | 3.0E-4  | 2.2E-2    |
| <input type="checkbox"/> | GOTERM_BP_FAT   | <a href="#">actin filament capping</a>                                 | <a href="#">RT</a>                                                                  |    | 4     | 3.4E-4  | 2.4E-2    |
| <input type="checkbox"/> | GOTERM_BP_FAT   | <a href="#">negative regulation of actin filament depolymerization</a> | <a href="#">RT</a>                                                                  |    | 4     | 4.4E-4  | 2.9E-2    |
| <input type="checkbox"/> | SP_PIR_KEYWORDS | <a href="#">cytoskeleton</a>                                           | <a href="#">RT</a>                                                                  |    | 12    | 4.7E-4  | 9.2E-3    |
| <input type="checkbox"/> | GOTERM_BP_FAT   | <a href="#">regulation of actin filament</a>                           | <a href="#">RT</a>                                                                  |    | 4     | 6.3E-4  | 3.6E-2    |

|                             |                 |                                                                        |    |  |                               |          |        |              |                |                  |
|-----------------------------|-----------------|------------------------------------------------------------------------|----|--|-------------------------------|----------|--------|--------------|----------------|------------------|
| <input type="checkbox"/>    | GOTERM_BP_FAT   | <a href="#">depolymerization</a>                                       | RT |  | 4                             | 7.0E-4   | 3.8E-2 |              |                |                  |
| <input type="checkbox"/>    | GOTERM_BP_FAT   | <a href="#">negative regulation of actin filament polymerization</a>   | RT |  | 4                             | 7.0E-4   | 3.8E-2 |              |                |                  |
| <input type="checkbox"/>    | GOTERM_BP_FAT   | <a href="#">cell motion</a>                                            | RT |  | 11                            | 7.7E-4   | 3.9E-2 |              |                |                  |
| <input type="checkbox"/>    | GOTERM_BP_FAT   | <a href="#">negative regulation of protein polymerization</a>          | RT |  | 4                             | 7.8E-4   | 3.8E-2 |              |                |                  |
| <input type="checkbox"/>    | GOTERM_BP_FAT   | <a href="#">negative regulation of protein complex assembly</a>        | RT |  | 4                             | 1.2E-3   | 5.4E-2 |              |                |                  |
| <input type="checkbox"/>    | GOTERM_BP_FAT   | <a href="#">negative regulation of protein complex disassembly</a>     | RT |  | 4                             | 2.1E-3   | 8.8E-2 |              |                |                  |
| <input type="checkbox"/>    | GOTERM_CC_FAT   | <a href="#">intracellular non-membrane-bounded organelle</a>           | RT |  | 31                            | 3.1E-3   | 4.6E-2 |              |                |                  |
| <input type="checkbox"/>    | GOTERM_CC_FAT   | <a href="#">non-membrane-bounded organelle</a>                         | RT |  | 31                            | 3.1E-3   | 4.6E-2 |              |                |                  |
| <input type="checkbox"/>    | GOTERM_BP_FAT   | <a href="#">regulation of protein complex disassembly</a>              | RT |  | 4                             | 4.0E-3   | 1.5E-1 |              |                |                  |
| <input type="checkbox"/>    | GOTERM_BP_FAT   | <a href="#">negative regulation of cytoskeleton organization</a>       | RT |  | 4                             | 5.0E-3   | 1.7E-1 |              |                |                  |
| <input type="checkbox"/>    | GOTERM_BP_FAT   | <a href="#">negative regulation of organelle organization</a>          | RT |  | 4                             | 1.5E-2   | 3.7E-1 |              |                |                  |
| <input type="checkbox"/>    | KEGG_PATHWAY    | <a href="#">Regulation of actin cytoskeleton</a>                       | RT |  | 7                             | 1.6E-2   | 2.9E-1 |              |                |                  |
| <input type="checkbox"/>    | KEGG_PATHWAY    | <a href="#">Pathogenic Escherichia coli infection</a>                  | RT |  | 4                             | 1.7E-2   | 2.3E-1 |              |                |                  |
| <input type="checkbox"/>    | GOTERM_CC_FAT   | <a href="#">cell cortex part</a>                                       | RT |  | 4                             | 2.1E-2   | 1.6E-1 |              |                |                  |
| <input type="checkbox"/>    | GOTERM_CC_FAT   | <a href="#">cytoskeleton</a>                                           | RT |  | 17                            | 3.4E-2   | 2.1E-1 |              |                |                  |
| <input type="checkbox"/>    | GOTERM_CC_FAT   | <a href="#">cytoskeletal part</a>                                      | RT |  | 13                            | 3.7E-2   | 2.2E-1 |              |                |                  |
| <input type="checkbox"/>    | GOTERM_CC_FAT   | <a href="#">cortical cytoskeleton</a>                                  | RT |  | 3                             | 4.8E-2   | 2.5E-1 |              |                |                  |
| <input type="checkbox"/>    | GOTERM_BP_FAT   | <a href="#">actin cytoskeleton organization</a>                        | RT |  | 5                             | 5.4E-2   | 6.4E-1 |              |                |                  |
| <input type="checkbox"/>    | GOTERM_BP_FAT   | <a href="#">negative regulation of cellular component organization</a> | RT |  | 4                             | 6.0E-2   | 6.6E-1 |              |                |                  |
| <input type="checkbox"/>    | KEGG_PATHWAY    | <a href="#">Fc gamma R-mediated phagocytosis</a>                       | RT |  | 4                             | 6.3E-2   | 5.5E-1 |              |                |                  |
| <input type="checkbox"/>    | GOTERM_BP_FAT   | <a href="#">actin filament-based process</a>                           | RT |  | 5                             | 6.5E-2   | 6.8E-1 |              |                |                  |
| <input type="checkbox"/>    | GOTERM_CC_FAT   | <a href="#">cell cortex</a>                                            | RT |  | 4                             | 8.6E-2   | 3.7E-1 |              |                |                  |
| <input type="checkbox"/>    | GOTERM_BP_FAT   | <a href="#">cell projection organization</a>                           | RT |  | 5                             | 2.0E-1   | 9.0E-1 |              |                |                  |
| <input type="checkbox"/>    | GOTERM_BP_FAT   | <a href="#">cytoskeleton organization</a>                              | RT |  | 5                             | 2.9E-1   | 9.5E-1 |              |                |                  |
| <b>Annotation Cluster 3</b> |                 |                                                                        |    |  | <b>Enrichment Score: 2.51</b> | <b>G</b> |        | <b>Count</b> | <b>P_Value</b> | <b>Benjamini</b> |
| <input type="checkbox"/>    | GOTERM_CC_FAT   | <a href="#">pigment granule</a>                                        | RT |  | 7                             | 4.0E-5   | 7.9E-4 |              |                |                  |
| <input type="checkbox"/>    | GOTERM_CC_FAT   | <a href="#">melanosome</a>                                             | RT |  | 7                             | 4.0E-5   | 7.9E-4 |              |                |                  |
| <input type="checkbox"/>    | GOTERM_CC_FAT   | <a href="#">cytoplasmic membrane-bounded vesicle</a>                   | RT |  | 11                            | 5.6E-3   | 7.2E-2 |              |                |                  |
| <input type="checkbox"/>    | GOTERM_CC_FAT   | <a href="#">membrane-bounded vesicle</a>                               | RT |  | 11                            | 7.0E-3   | 8.3E-2 |              |                |                  |
| <input type="checkbox"/>    | GOTERM_CC_FAT   | <a href="#">cytoplasmic vesicle</a>                                    | RT |  | 11                            | 1.6E-2   | 1.6E-1 |              |                |                  |
| <input type="checkbox"/>    | GOTERM_CC_FAT   | <a href="#">vesicle</a>                                                | RT |  | 11                            | 2.1E-2   | 1.6E-1 |              |                |                  |
| <input type="checkbox"/>    | GOTERM_CC_FAT   | <a href="#">secretory granule</a>                                      | RT |  | 4                             | 1.4E-1   | 5.0E-1 |              |                |                  |
| <b>Annotation Cluster 4</b> |                 |                                                                        |    |  | <b>Enrichment Score: 2.08</b> | <b>G</b> |        | <b>Count</b> | <b>P_Value</b> | <b>Benjamini</b> |
| <input type="checkbox"/>    | GOTERM_CC_FAT   | <a href="#">eukaryotic translation elongation factor 1 complex</a>     | RT |  | 3                             | 4.9E-4   | 8.9E-3 |              |                |                  |
| <input type="checkbox"/>    | SP_PIR_KEYWORDS | <a href="#">elongation factor</a>                                      | RT |  | 3                             | 5.3E-3   | 6.1E-2 |              |                |                  |
| <input type="checkbox"/>    | GOTERM_MF_FAT   | <a href="#">translation elongation factor activity</a>                 | RT |  | 3                             | 1.2E-2   | 3.7E-1 |              |                |                  |
| <input type="checkbox"/>    | GOTERM_MF_FAT   | <a href="#">translation factor activity, nucleic acid binding</a>      | RT |  | 3                             | 1.5E-1   | 9.2E-1 |              |                |                  |
| <b>Annotation Cluster 5</b> |                 |                                                                        |    |  | <b>Enrichment Score: 2.02</b> | <b>G</b> |        | <b>Count</b> | <b>P_Value</b> | <b>Benjamini</b> |
| <input type="checkbox"/>    | GOTERM_MF_FAT   | <a href="#">structural constituent of cytoskeleton</a>                 | RT |  | 6                             | 1.7E-4   | 1.1E-2 |              |                |                  |
| <input type="checkbox"/>    | SP_PIR_KEYWORDS | <a href="#">actin binding</a>                                          | RT |  | 4                             | 1.2E-3   | 1.8E-2 |              |                |                  |
| <input type="checkbox"/>    | GOTERM_CC_FAT   | <a href="#">sarcomere</a>                                              | RT |  | 4                             | 3.3E-2   | 2.2E-1 |              |                |                  |
| <input type="checkbox"/>    | GOTERM_CC_FAT   | <a href="#">myofibril</a>                                              | RT |  | 4                             | 4.5E-2   | 2.5E-1 |              |                |                  |
| <input type="checkbox"/>    | GOTERM_CC_FAT   | <a href="#">contractile fiber part</a>                                 | RT |  | 4                             | 4.7E-2   | 2.5E-1 |              |                |                  |
| <input type="checkbox"/>    | GOTERM_CC_FAT   | <a href="#">contractile fiber</a>                                      | RT |  | 4                             | 5.5E-2   | 2.7E-1 |              |                |                  |
| <b>Annotation Cluster 6</b> |                 |                                                                        |    |  | <b>Enrichment Score: 1.85</b> | <b>G</b> |        | <b>Count</b> | <b>P_Value</b> | <b>Benjamini</b> |
| <input type="checkbox"/>    | SP_PIR_KEYWORDS | <a href="#">signal</a>                                                 | RT |  | 31                            | 8.2E-4   | 1.5E-2 |              |                |                  |
| <input type="checkbox"/>    | UP_SEQ_FEATURE  | <a href="#">signal peptide</a>                                         | RT |  | 31                            | 9.2E-4   | 1.9E-1 |              |                |                  |
| <input type="checkbox"/>    | SP_PIR_KEYWORDS | <a href="#">disulfide bond</a>                                         | RT |  | 27                            | 3.5E-3   | 4.3E-2 |              |                |                  |
| <input type="checkbox"/>    | UP_SEQ_FEATURE  | <a href="#">disulfide bond</a>                                         | RT |  | 26                            | 4.8E-3   | 4.2E-1 |              |                |                  |
| <input type="checkbox"/>    | GOTERM_CC_FAT   | <a href="#">extracellular region</a>                                   | RT |  | 23                            | 2.3E-2   | 1.7E-1 |              |                |                  |
| <input type="checkbox"/>    | SP_PIR_KEYWORDS | <a href="#">Secreted</a>                                               | RT |  | 15                            | 5.4E-2   | 3.3E-1 |              |                |                  |
| <input type="checkbox"/>    | SP_PIR_KEYWORDS | <a href="#">glycoprotein</a>                                           | RT |  | 27                            | 2.3E-1   | 7.7E-1 |              |                |                  |
| <input type="checkbox"/>    | UP_SEQ_FEATURE  | <a href="#">glycosylation site:N-linked (GlcNAc...)</a>                | RT |  | 24                            | 4.1E-1   | 1.0E0  |              |                |                  |
| <b>Annotation Cluster 7</b> |                 |                                                                        |    |  | <b>Enrichment Score: 1.79</b> | <b>G</b> |        | <b>Count</b> | <b>P_Value</b> | <b>Benjamini</b> |
| <input type="checkbox"/>    | SMART           | <a href="#">EGF_CA</a>                                                 | RT |  | 5                             | 1.2E-3   | 5.8E-2 |              |                |                  |
| <input type="checkbox"/>    | INTERPRO        | <a href="#">EGF-like domain</a>                                        | RT |  | 5                             | 1.2E-3   | 5.8E-2 |              |                |                  |

|                          |                 |                                                                            |    |  |    |        |        |
|--------------------------|-----------------|----------------------------------------------------------------------------|----|--|----|--------|--------|
| <input type="checkbox"/> | INTERPRO        | <a href="#">EGF-like region, conserved site</a>                            | RT |  | 8  | 1.6E-3 | 3.7E-1 |
| <input type="checkbox"/> | INTERPRO        | <a href="#">EGF-like calcium-binding</a>                                   | RT |  | 5  | 2.4E-3 | 2.9E-1 |
| <input type="checkbox"/> | INTERPRO        | <a href="#">EGF-like calcium-binding, conserved site</a>                   | RT |  | 5  | 2.4E-3 | 2.9E-1 |
| <input type="checkbox"/> | UP_SEQ_FEATURE  | domain: EGF-like 6; calcium-binding                                        | RT |  | 3  | 7.5E-3 | 5.0E-1 |
| <input type="checkbox"/> | SP_PIR_KEYWORDS | <a href="#">extracellular matrix</a>                                       | RT |  | 6  | 8.5E-3 | 8.8E-2 |
| <input type="checkbox"/> | INTERPRO        | <a href="#">EGF calcium-binding</a>                                        | RT |  | 4  | 8.5E-3 | 5.6E-1 |
| <input type="checkbox"/> | SP_PIR_KEYWORDS | <a href="#">calcium</a>                                                    | RT |  | 11 | 8.9E-3 | 8.9E-2 |
| <input type="checkbox"/> | GOTERM_CC_FAT   | <a href="#">extracellular matrix</a>                                       | RT |  | 8  | 1.1E-2 | 1.3E-1 |
| <input type="checkbox"/> | UP_SEQ_FEATURE  | domain: EGF-like 4; calcium-binding                                        | RT |  | 3  | 1.3E-2 | 6.3E-1 |
| <input type="checkbox"/> | UP_SEQ_FEATURE  | domain: EGF-like 3; calcium-binding                                        | RT |  | 3  | 1.6E-2 | 6.5E-1 |
| <input type="checkbox"/> | UP_SEQ_FEATURE  | domain: EGF-like 5; calcium-binding                                        | RT |  | 3  | 1.6E-2 | 6.5E-1 |
| <input type="checkbox"/> | GOTERM_CC_FAT   | <a href="#">extracellular region part</a>                                  | RT |  | 14 | 1.8E-2 | 1.6E-1 |
| <input type="checkbox"/> | INTERPRO        | <a href="#">EGF-type aspartate/asparagine hydroxylation conserved site</a> | RT |  | 4  | 1.9E-2 | 7.5E-1 |
| <input type="checkbox"/> | GOTERM_MF_FAT   | <a href="#">extracellular matrix structural constituent</a>                | RT |  | 4  | 2.2E-2 | 5.3E-1 |
| <input type="checkbox"/> | GOTERM_MF_FAT   | <a href="#">calcium ion binding</a>                                        | RT |  | 13 | 2.6E-2 | 5.5E-1 |
| <input type="checkbox"/> | GOTERM_CC_FAT   | <a href="#">proteinaceous extracellular matrix</a>                         | RT |  | 7  | 2.7E-2 | 1.9E-1 |
| <input type="checkbox"/> | SP_PIR_KEYWORDS | <a href="#">egf-like domain</a>                                            | RT |  | 5  | 3.2E-2 | 2.3E-1 |
| <input type="checkbox"/> | SP_PIR_KEYWORDS | <a href="#">Secreted</a>                                                   | RT |  | 15 | 5.4E-2 | 3.3E-1 |
| <input type="checkbox"/> | SMART           | <a href="#">EGF</a>                                                        | RT |  | 3  | 2.5E-1 | 9.8E-1 |
| <input type="checkbox"/> | INTERPRO        | <a href="#">EGF-like, type 3</a>                                           | RT |  | 3  | 3.1E-1 | 1.0E0  |
| <input type="checkbox"/> | INTERPRO        | <a href="#">EGF-like</a>                                                   | RT |  | 3  | 3.3E-1 | 1.0E0  |

| Annotation Cluster 8 |  | Enrichment Score: 1.77 |  |  | Count | P_Value | Benjamini |
|----------------------|--|------------------------|--|--|-------|---------|-----------|
|----------------------|--|------------------------|--|--|-------|---------|-----------|

|                          |                 |                                                  |    |  |    |        |        |
|--------------------------|-----------------|--------------------------------------------------|----|--|----|--------|--------|
| <input type="checkbox"/> | UP_SEQ_FEATURE  | short sequence motif: Prevents secretion from ER | RT |  | 5  | 2.6E-4 | 1.1E-1 |
| <input type="checkbox"/> | GOTERM_CC_FAT   | <a href="#">endoplasmic reticulum lumen</a>      | RT |  | 4  | 1.9E-2 | 1.6E-1 |
| <input type="checkbox"/> | SP_PIR_KEYWORDS | <a href="#">endoplasmic reticulum</a>            | RT |  | 9  | 3.2E-2 | 2.3E-1 |
| <input type="checkbox"/> | GOTERM_CC_FAT   | <a href="#">endoplasmic reticulum</a>            | RT |  | 13 | 3.9E-2 | 2.3E-1 |
| <input type="checkbox"/> | GOTERM_CC_FAT   | <a href="#">endoplasmic reticulum part</a>       | RT |  | 5  | 2.3E-1 | 6.7E-1 |

| Annotation Cluster 9 |  | Enrichment Score: 1.64 |  |  | Count | P_Value | Benjamini |
|----------------------|--|------------------------|--|--|-------|---------|-----------|
|----------------------|--|------------------------|--|--|-------|---------|-----------|

|                          |                 |                                                                                                       |    |  |    |        |        |
|--------------------------|-----------------|-------------------------------------------------------------------------------------------------------|----|--|----|--------|--------|
| <input type="checkbox"/> | SP_PIR_KEYWORDS | <a href="#">nadp</a>                                                                                  | RT |  | 6  | 1.3E-3 | 2.0E-2 |
| <input type="checkbox"/> | GOTERM_MF_FAT   | <a href="#">oxidoreductase activity, acting on the CH-CH group of donors, NAD or NADP as acceptor</a> | RT |  | 3  | 7.7E-3 | 2.9E-1 |
| <input type="checkbox"/> | SP_PIR_KEYWORDS | <a href="#">oxidoreductase</a>                                                                        | RT |  | 9  | 9.0E-3 | 8.5E-2 |
| <input type="checkbox"/> | GOTERM_BP_FAT   | <a href="#">oxidation reduction</a>                                                                   | RT |  | 10 | 1.9E-2 | 4.0E-1 |
| <input type="checkbox"/> | INTERPRO        | <a href="#">NAD(P)-binding domain</a>                                                                 | RT |  | 4  | 5.7E-2 | 9.4E-1 |
| <input type="checkbox"/> | GOTERM_MF_FAT   | <a href="#">cofactor binding</a>                                                                      | RT |  | 5  | 9.7E-2 | 8.4E-1 |
| <input type="checkbox"/> | GOTERM_MF_FAT   | <a href="#">coenzyme binding</a>                                                                      | RT |  | 3  | 3.6E-1 | 9.9E-1 |

| Annotation Cluster 10 |  | Enrichment Score: 1.42 |  |  | Count | P_Value | Benjamini |
|-----------------------|--|------------------------|--|--|-------|---------|-----------|
|-----------------------|--|------------------------|--|--|-------|---------|-----------|

|                          |                 |                                             |    |  |   |        |        |
|--------------------------|-----------------|---------------------------------------------|----|--|---|--------|--------|
| <input type="checkbox"/> | SP_PIR_KEYWORDS | <a href="#">plasma</a>                      | RT |  | 5 | 1.4E-3 | 2.0E-2 |
| <input type="checkbox"/> | SP_PIR_KEYWORDS | <a href="#">duplication</a>                 | RT |  | 6 | 6.8E-3 | 7.4E-2 |
| <input type="checkbox"/> | GOTERM_BP_FAT   | <a href="#">acute inflammatory response</a> | RT |  | 4 | 2.4E-2 | 4.6E-1 |
| <input type="checkbox"/> | GOTERM_BP_FAT   | <a href="#">response to wounding</a>        | RT |  | 7 | 1.2E-1 | 8.0E-1 |
| <input type="checkbox"/> | GOTERM_BP_FAT   | <a href="#">inflammatory response</a>       | RT |  | 4 | 3.3E-1 | 9.6E-1 |
| <input type="checkbox"/> | GOTERM_BP_FAT   | <a href="#">defense response</a>            | RT |  | 6 | 3.4E-1 | 9.6E-1 |

| Annotation Cluster 11 |  | Enrichment Score: 1.36 |  |  | Count | P_Value | Benjamini |
|-----------------------|--|------------------------|--|--|-------|---------|-----------|
|-----------------------|--|------------------------|--|--|-------|---------|-----------|

|                          |                 |                                                     |    |  |   |        |        |
|--------------------------|-----------------|-----------------------------------------------------|----|--|---|--------|--------|
| <input type="checkbox"/> | SP_PIR_KEYWORDS | <a href="#">gangliosidosis</a>                      | RT |  | 3 | 2.6E-4 | 5.7E-3 |
| <input type="checkbox"/> | GOTERM_BP_FAT   | <a href="#">glycosphingolipid metabolic process</a> | RT |  | 4 | 5.6E-4 | 3.4E-2 |
| <input type="checkbox"/> | GOTERM_BP_FAT   | <a href="#">glycolipid metabolic process</a>        | RT |  | 4 | 9.5E-4 | 4.4E-2 |
| <input type="checkbox"/> | SP_PIR_KEYWORDS | <a href="#">lysosome</a>                            | RT |  | 6 | 1.1E-3 | 1.8E-2 |
| <input type="checkbox"/> | KEGG_PATHWAY    | <a href="#">Lysosome</a>                            | RT |  | 6 | 5.0E-3 | 1.4E-1 |
| <input type="checkbox"/> | GOTERM_BP_FAT   | <a href="#">sphingolipid metabolic process</a>      | RT |  | 4 | 1.2E-2 | 3.2E-1 |
| <input type="checkbox"/> | GOTERM_BP_FAT   | <a href="#">membrane lipid metabolic process</a>    | RT |  | 4 | 1.4E-2 | 3.7E-1 |
| <input type="checkbox"/> | GOTERM_CC_FAT   | <a href="#">lysosome</a>                            | RT |  | 6 | 1.7E-2 | 1.6E-1 |
| <input type="checkbox"/> | GOTERM_CC_FAT   | <a href="#">lytic vacuole</a>                       | RT |  | 6 | 1.7E-2 | 1.6E-1 |
| <input type="checkbox"/> | SP_PIR_KEYWORDS | <a href="#">zymogen</a>                             | RT |  | 5 | 2.3E-2 | 1.8E-1 |
| <input type="checkbox"/> | GOTERM_CC_FAT   | <a href="#">vacuole</a>                             | RT |  | 6 | 3.4E-2 | 2.1E-1 |
| <input type="checkbox"/> | UP_SEQ_FEATURE  | propeptide: Activation peptide                      | RT |  | 3 | 5.6E-2 | 9.5E-1 |
| <input type="checkbox"/> | GOTERM_MF_FAT   | <a href="#">enzyme activator activity</a>           | RT |  | 5 | 2.1E-1 | 9.6E-1 |
| <input type="checkbox"/> | SP_PIR_KEYWORDS | <a href="#">Protease</a>                            | RT |  | 5 | 2.4E-1 | 7.9E-1 |

|                              |                 |                                                                                                      |    |  |                               |          |        |              |                |                  |
|------------------------------|-----------------|------------------------------------------------------------------------------------------------------|----|--|-------------------------------|----------|--------|--------------|----------------|------------------|
| <input type="checkbox"/>     | GOTERM_BP_FAT   | <a href="#">lipid localization</a>                                                                   | RT |  | 3                             | 2.6E-1   | 9.3E-1 |              |                |                  |
| <input type="checkbox"/>     | SP_PIR_KEYWORDS | <a href="#">hydrolase</a>                                                                            | RT |  | 11                            | 2.9E-1   | 8.4E-1 |              |                |                  |
| <input type="checkbox"/>     | GOTERM_BP_FAT   | <a href="#">proteolysis</a>                                                                          | RT |  | 9                             | 3.4E-1   | 9.6E-1 |              |                |                  |
| <input type="checkbox"/>     | GOTERM_MF_FAT   | <a href="#">serine-type peptidase activity</a>                                                       | RT |  | 3                             | 3.6E-1   | 9.9E-1 |              |                |                  |
| <input type="checkbox"/>     | GOTERM_MF_FAT   | <a href="#">serine hydrolase activity</a>                                                            | RT |  | 3                             | 3.6E-1   | 9.9E-1 |              |                |                  |
| <input type="checkbox"/>     | GOTERM_MF_FAT   | <a href="#">endopeptidase activity</a>                                                               | RT |  | 4                             | 4.9E-1   | 1.0E0  |              |                |                  |
| <input type="checkbox"/>     | GOTERM_MF_FAT   | <a href="#">peptidase activity, acting on L-amino acid peptides</a>                                  | RT |  | 5                             | 5.4E-1   | 1.0E0  |              |                |                  |
| <input type="checkbox"/>     | GOTERM_MF_FAT   | <a href="#">peptidase activity</a>                                                                   | RT |  | 5                             | 5.8E-1   | 1.0E0  |              |                |                  |
| <input type="checkbox"/>     | GOTERM_CC_FAT   | <a href="#">integral to membrane</a>                                                                 | RT |  | 7                             | 1.0E0    | 1.0E0  |              |                |                  |
| <b>Annotation Cluster 12</b> |                 |                                                                                                      |    |  | <b>Enrichment Score: 1.34</b> | <b>G</b> |        | <b>Count</b> | <b>P_Value</b> | <b>Benjamini</b> |
| <input type="checkbox"/>     | GOTERM_BP_FAT   | <a href="#">NADP metabolic process</a>                                                               | RT |  | 3                             | 4.4E-3   | 1.6E-1 |              |                |                  |
| <input type="checkbox"/>     | GOTERM_BP_FAT   | <a href="#">nicotinamide nucleotide metabolic process</a>                                            | RT |  | 3                             | 2.6E-2   | 4.9E-1 |              |                |                  |
| <input type="checkbox"/>     | GOTERM_BP_FAT   | <a href="#">nicotinamide metabolic process</a>                                                       | RT |  | 3                             | 2.6E-2   | 4.9E-1 |              |                |                  |
| <input type="checkbox"/>     | GOTERM_BP_FAT   | <a href="#">alkaloid metabolic process</a>                                                           | RT |  | 3                             | 2.7E-2   | 4.9E-1 |              |                |                  |
| <input type="checkbox"/>     | GOTERM_BP_FAT   | <a href="#">pyridine nucleotide metabolic process</a>                                                | RT |  | 3                             | 2.9E-2   | 4.9E-1 |              |                |                  |
| <input type="checkbox"/>     | GOTERM_BP_FAT   | <a href="#">oxidoreduction coenzyme metabolic process</a>                                            | RT |  | 3                             | 4.2E-2   | 6.0E-1 |              |                |                  |
| <input type="checkbox"/>     | GOTERM_BP_FAT   | <a href="#">cellular amide metabolic process</a>                                                     | RT |  | 3                             | 4.8E-2   | 6.2E-1 |              |                |                  |
| <input type="checkbox"/>     | GOTERM_BP_FAT   | <a href="#">secondary metabolic process</a>                                                          | RT |  | 3                             | 8.8E-2   | 7.3E-1 |              |                |                  |
| <input type="checkbox"/>     | GOTERM_BP_FAT   | <a href="#">coenzyme metabolic process</a>                                                           | RT |  | 3                             | 2.5E-1   | 9.3E-1 |              |                |                  |
| <input type="checkbox"/>     | GOTERM_BP_FAT   | <a href="#">cofactor metabolic process</a>                                                           | RT |  | 3                             | 3.5E-1   | 9.6E-1 |              |                |                  |
| <b>Annotation Cluster 13</b> |                 |                                                                                                      |    |  | <b>Enrichment Score: 1.19</b> | <b>G</b> |        | <b>Count</b> | <b>P_Value</b> | <b>Benjamini</b> |
| <input type="checkbox"/>     | GOTERM_BP_FAT   | <a href="#">cellular response to reactive oxygen species</a>                                         | RT |  | 3                             | 1.5E-2   | 3.7E-1 |              |                |                  |
| <input type="checkbox"/>     | GOTERM_BP_FAT   | <a href="#">cellular response to oxidative stress</a>                                                | RT |  | 3                             | 3.0E-2   | 4.9E-1 |              |                |                  |
| <input type="checkbox"/>     | GOTERM_BP_FAT   | <a href="#">cellular response to stress</a>                                                          | RT |  | 8                             | 6.5E-2   | 6.8E-1 |              |                |                  |
| <input type="checkbox"/>     | GOTERM_BP_FAT   | <a href="#">response to reactive oxygen species</a>                                                  | RT |  | 3                             | 8.1E-2   | 7.1E-1 |              |                |                  |
| <input type="checkbox"/>     | GOTERM_BP_FAT   | <a href="#">response to oxidative stress</a>                                                         | RT |  | 4                             | 8.4E-2   | 7.2E-1 |              |                |                  |
| <input type="checkbox"/>     | GOTERM_BP_FAT   | <a href="#">response to inorganic substance</a>                                                      | RT |  | 3                             | 3.7E-1   | 9.7E-1 |              |                |                  |
| <b>Annotation Cluster 14</b> |                 |                                                                                                      |    |  | <b>Enrichment Score: 1.19</b> | <b>G</b> |        | <b>Count</b> | <b>P_Value</b> | <b>Benjamini</b> |
| <input type="checkbox"/>     | GOTERM_BP_FAT   | <a href="#">cell motion</a>                                                                          | RT |  | 11                            | 7.7E-4   | 3.9E-2 |              |                |                  |
| <input type="checkbox"/>     | GOTERM_BP_FAT   | <a href="#">cell migration</a>                                                                       | RT |  | 4                             | 2.5E-1   | 9.3E-1 |              |                |                  |
| <input type="checkbox"/>     | GOTERM_BP_FAT   | <a href="#">localization of cell</a>                                                                 | RT |  | 4                             | 3.0E-1   | 9.5E-1 |              |                |                  |
| <input type="checkbox"/>     | GOTERM_BP_FAT   | <a href="#">cell motility</a>                                                                        | RT |  | 4                             | 3.0E-1   | 9.5E-1 |              |                |                  |
| <b>Annotation Cluster 15</b> |                 |                                                                                                      |    |  | <b>Enrichment Score: 1.19</b> | <b>G</b> |        | <b>Count</b> | <b>P_Value</b> | <b>Benjamini</b> |
| <input type="checkbox"/>     | GOTERM_BP_FAT   | <a href="#">gonad development</a>                                                                    | RT |  | 4                             | 3.3E-2   | 5.2E-1 |              |                |                  |
| <input type="checkbox"/>     | GOTERM_BP_FAT   | <a href="#">reproductive structure development</a>                                                   | RT |  | 4                             | 4.5E-2   | 6.1E-1 |              |                |                  |
| <input type="checkbox"/>     | GOTERM_BP_FAT   | <a href="#">development of primary sexual characteristics</a>                                        | RT |  | 4                             | 4.6E-2   | 6.0E-1 |              |                |                  |
| <input type="checkbox"/>     | GOTERM_BP_FAT   | <a href="#">female gonad development</a>                                                             | RT |  | 3                             | 6.1E-2   | 6.7E-1 |              |                |                  |
| <input type="checkbox"/>     | GOTERM_BP_FAT   | <a href="#">sex differentiation</a>                                                                  | RT |  | 4                             | 7.0E-2   | 6.9E-1 |              |                |                  |
| <input type="checkbox"/>     | GOTERM_BP_FAT   | <a href="#">female sex differentiation</a>                                                           | RT |  | 3                             | 7.0E-2   | 6.9E-1 |              |                |                  |
| <input type="checkbox"/>     | GOTERM_BP_FAT   | <a href="#">development of primary female sexual characteristics</a>                                 | RT |  | 3                             | 7.0E-2   | 6.9E-1 |              |                |                  |
| <input type="checkbox"/>     | GOTERM_BP_FAT   | <a href="#">reproductive developmental process</a>                                                   | RT |  | 4                             | 2.3E-1   | 9.1E-1 |              |                |                  |
| <b>Annotation Cluster 16</b> |                 |                                                                                                      |    |  | <b>Enrichment Score: 1.12</b> | <b>G</b> |        | <b>Count</b> | <b>P_Value</b> | <b>Benjamini</b> |
| <input type="checkbox"/>     | GOTERM_MF_FAT   | <a href="#">enzyme inhibitor activity</a>                                                            | RT |  | 6                             | 4.1E-2   | 6.7E-1 |              |                |                  |
| <input type="checkbox"/>     | GOTERM_MF_FAT   | <a href="#">endopeptidase inhibitor activity</a>                                                     | RT |  | 4                             | 8.2E-2   | 8.5E-1 |              |                |                  |
| <input type="checkbox"/>     | GOTERM_MF_FAT   | <a href="#">peptidase inhibitor activity</a>                                                         | RT |  | 4                             | 9.2E-2   | 8.6E-1 |              |                |                  |
| <input type="checkbox"/>     | SP_PIR_KEYWORDS | <a href="#">protease inhibitor</a>                                                                   | RT |  | 3                             | 1.1E-1   | 5.2E-1 |              |                |                  |
| <b>Annotation Cluster 17</b> |                 |                                                                                                      |    |  | <b>Enrichment Score: 1.03</b> | <b>G</b> |        | <b>Count</b> | <b>P_Value</b> | <b>Benjamini</b> |
| <input type="checkbox"/>     | SP_PIR_KEYWORDS | <a href="#">isopeptide bond</a>                                                                      | RT |  | 6                             | 2.6E-2   | 2.0E-1 |              |                |                  |
| <input type="checkbox"/>     | UP_SEQ_FEATURE  | <a href="#">cross-link: Glycyl lysine isopeptide (Lys-Gly) (interchain with G-Cter in ubiquitin)</a> | RT |  | 4                             | 8.7E-2   | 9.7E-1 |              |                |                  |
| <input type="checkbox"/>     | SP_PIR_KEYWORDS | <a href="#">ubl conjugation</a>                                                                      | RT |  | 5                             | 3.7E-1   | 9.1E-1 |              |                |                  |
| <b>Annotation Cluster 18</b> |                 |                                                                                                      |    |  | <b>Enrichment Score: 1.03</b> | <b>G</b> |        | <b>Count</b> | <b>P_Value</b> | <b>Benjamini</b> |
| <input type="checkbox"/>     | GOTERM_BP_FAT   | <a href="#">regulation of DNA repair</a>                                                             | RT |  | 3                             | 8.3E-3   | 2.5E-1 |              |                |                  |
| <input type="checkbox"/>     | GOTERM_BP_FAT   | <a href="#">regulation of cellular response to stress</a>                                            | RT |  | 4                             | 2.7E-2   | 4.9E-1 |              |                |                  |
| <input type="checkbox"/>     | GOTERM_BP_FAT   | <a href="#">regulation of binding</a>                                                                | RT |  | 4                             | 7.2E-2   | 6.9E-1 |              |                |                  |
| <input type="checkbox"/>     | GOTERM_BP_FAT   | <a href="#">regulation of transcription factor activity</a>                                          | RT |  | 3                             | 1.4E-1   | 8.3E-1 |              |                |                  |
| <input type="checkbox"/>     | GOTERM_BP_FAT   | <a href="#">regulation of DNA metabolic process</a>                                                  | RT |  | 3                             | 1.6E-1   | 8.7E-1 |              |                |                  |
| <input type="checkbox"/>     | GOTERM_BP_FAT   | <a href="#">regulation of DNA binding</a>                                                            | RT |  | 3                             | 1.8E-1   | 8.8E-1 |              |                |                  |

|                          |                 |                                                                       |    |  |                        |        |        |       |         |           |
|--------------------------|-----------------|-----------------------------------------------------------------------|----|--|------------------------|--------|--------|-------|---------|-----------|
| <input type="checkbox"/> | GOTERM_BP_FAT   | <a href="#">regulation of transcription</a>                           | RT |  | 3                      | 1.0E0  | 1.0E0  |       |         |           |
| Annotation Cluster 19    |                 |                                                                       |    |  | Enrichment Score: 0.97 |        |        | Count | P_Value | Benjamini |
| <input type="checkbox"/> | INTERPRO        | <a href="#">EF-Hand type</a>                                          | RT |  | 5                      | 4.9E-2 | 9.5E-1 |       |         |           |
| <input type="checkbox"/> | UP_SEQ_FEATURE  | domain: EF-hand 1                                                     | RT |  | 4                      | 7.0E-2 | 9.5E-1 |       |         |           |
| <input type="checkbox"/> | UP_SEQ_FEATURE  | domain: EF-hand 2                                                     | RT |  | 4                      | 7.0E-2 | 9.5E-1 |       |         |           |
| <input type="checkbox"/> | UP_SEQ_FEATURE  | domain: EF-hand 3                                                     | RT |  | 3                      | 8.7E-2 | 9.6E-1 |       |         |           |
| <input type="checkbox"/> | UP_SEQ_FEATURE  | calcium-binding region: 2                                             | RT |  | 3                      | 1.2E-1 | 9.9E-1 |       |         |           |
| <input type="checkbox"/> | INTERPRO        | <a href="#">EF-HAND 2</a>                                             | RT |  | 4                      | 1.3E-1 | 9.9E-1 |       |         |           |
| <input type="checkbox"/> | INTERPRO        | <a href="#">EF-HAND 1</a>                                             | RT |  | 4                      | 1.3E-1 | 9.8E-1 |       |         |           |
| <input type="checkbox"/> | UP_SEQ_FEATURE  | calcium-binding region: 1                                             | RT |  | 3                      | 1.4E-1 | 9.9E-1 |       |         |           |
| <input type="checkbox"/> | SMART           | <a href="#">EFh</a>                                                   | RT |  | 3                      | 1.5E-1 | 9.4E-1 |       |         |           |
| <input type="checkbox"/> | INTERPRO        | <a href="#">Calcium-binding EF-hand</a>                               | RT |  | 3                      | 2.0E-1 | 1.0E0  |       |         |           |
| Annotation Cluster 20    |                 |                                                                       |    |  | Enrichment Score: 0.95 |        |        | Count | P_Value | Benjamini |
| <input type="checkbox"/> | INTERPRO        | <a href="#">EGF-like region, conserved site</a>                       | RT |  | 8                      | 1.6E-3 | 3.7E-1 |       |         |           |
| <input type="checkbox"/> | SP_PIR_KEYWORDS | <a href="#">extracellular matrix</a>                                  | RT |  | 6                      | 8.5E-3 | 8.8E-2 |       |         |           |
| <input type="checkbox"/> | GOTERM_CC_FAT   | <a href="#">extracellular matrix</a>                                  | RT |  | 8                      | 1.1E-2 | 1.3E-1 |       |         |           |
| <input type="checkbox"/> | GOTERM_CC_FAT   | <a href="#">proteinaceous extracellular matrix</a>                    | RT |  | 7                      | 2.7E-2 | 1.9E-1 |       |         |           |
| <input type="checkbox"/> | GOTERM_CC_FAT   | <a href="#">basement membrane</a>                                     | RT |  | 3                      | 1.1E-1 | 4.2E-1 |       |         |           |
| <input type="checkbox"/> | KEGG_PATHWAY    | <a href="#">Small cell lung cancer</a>                                | RT |  | 3                      | 1.9E-1 | 8.9E-1 |       |         |           |
| <input type="checkbox"/> | KEGG_PATHWAY    | <a href="#">ECM-receptor interaction</a>                              | RT |  | 3                      | 1.9E-1 | 8.9E-1 |       |         |           |
| <input type="checkbox"/> | GOTERM_CC_FAT   | <a href="#">extracellular matrix part</a>                             | RT |  | 3                      | 2.0E-1 | 6.4E-1 |       |         |           |
| <input type="checkbox"/> | KEGG_PATHWAY    | <a href="#">Pathways in cancer</a>                                    | RT |  | 5                      | 3.9E-1 | 9.9E-1 |       |         |           |
| <input type="checkbox"/> | KEGG_PATHWAY    | <a href="#">Focal adhesion</a>                                        | RT |  | 3                      | 5.8E-1 | 1.0E0  |       |         |           |
| <input type="checkbox"/> | SP_PIR_KEYWORDS | <a href="#">cell adhesion</a>                                         | RT |  | 3                      | 6.5E-1 | 9.9E-1 |       |         |           |
| <input type="checkbox"/> | GOTERM_BP_FAT   | <a href="#">cell adhesion</a>                                         | RT |  | 3                      | 9.4E-1 | 1.0E0  |       |         |           |
| <input type="checkbox"/> | GOTERM_BP_FAT   | <a href="#">biological adhesion</a>                                   | RT |  | 3                      | 9.4E-1 | 1.0E0  |       |         |           |
| Annotation Cluster 21    |                 |                                                                       |    |  | Enrichment Score: 0.92 |        |        | Count | P_Value | Benjamini |
| <input type="checkbox"/> | GOTERM_CC_FAT   | <a href="#">organelle lumen</a>                                       | RT |  | 19                     | 9.0E-2 | 3.8E-1 |       |         |           |
| <input type="checkbox"/> | GOTERM_CC_FAT   | <a href="#">membrane-enclosed lumen</a>                               | RT |  | 19                     | 1.0E-1 | 4.2E-1 |       |         |           |
| <input type="checkbox"/> | GOTERM_CC_FAT   | <a href="#">intracellular organelle lumen</a>                         | RT |  | 17                     | 1.9E-1 | 6.2E-1 |       |         |           |
| Annotation Cluster 22    |                 |                                                                       |    |  | Enrichment Score: 0.89 |        |        | Count | P_Value | Benjamini |
| <input type="checkbox"/> | GOTERM_BP_FAT   | <a href="#">positive regulation of hydrolase activity</a>             | RT |  | 6                      | 5.4E-3 | 1.8E-1 |       |         |           |
| <input type="checkbox"/> | GOTERM_BP_FAT   | <a href="#">regulation of peptidase activity</a>                      | RT |  | 4                      | 1.7E-2 | 3.8E-1 |       |         |           |
| <input type="checkbox"/> | GOTERM_BP_FAT   | <a href="#">regulation of hydrolase activity</a>                      | RT |  | 7                      | 1.9E-2 | 4.1E-1 |       |         |           |
| <input type="checkbox"/> | GOTERM_BP_FAT   | <a href="#">activation of caspase activity</a>                        | RT |  | 3                      | 4.5E-2 | 6.1E-1 |       |         |           |
| <input type="checkbox"/> | GOTERM_BP_FAT   | <a href="#">positive regulation of peptidase activity</a>             | RT |  | 3                      | 5.3E-2 | 6.4E-1 |       |         |           |
| <input type="checkbox"/> | GOTERM_BP_FAT   | <a href="#">positive regulation of caspase activity</a>               | RT |  | 3                      | 5.3E-2 | 6.4E-1 |       |         |           |
| <input type="checkbox"/> | GOTERM_BP_FAT   | <a href="#">regulation of caspase activity</a>                        | RT |  | 3                      | 8.8E-2 | 7.3E-1 |       |         |           |
| <input type="checkbox"/> | GOTERM_BP_FAT   | <a href="#">regulation of endopeptidase activity</a>                  | RT |  | 3                      | 9.4E-2 | 7.4E-1 |       |         |           |
| <input type="checkbox"/> | GOTERM_BP_FAT   | <a href="#">regulation of apoptosis</a>                               | RT |  | 7                      | 3.9E-1 | 9.7E-1 |       |         |           |
| <input type="checkbox"/> | GOTERM_BP_FAT   | <a href="#">regulation of programmed cell death</a>                   | RT |  | 7                      | 4.0E-1 | 9.7E-1 |       |         |           |
| <input type="checkbox"/> | GOTERM_BP_FAT   | <a href="#">regulation of cell death</a>                              | RT |  | 7                      | 4.1E-1 | 9.7E-1 |       |         |           |
| <input type="checkbox"/> | GOTERM_BP_FAT   | <a href="#">cell death</a>                                            | RT |  | 5                      | 6.7E-1 | 1.0E0  |       |         |           |
| <input type="checkbox"/> | GOTERM_BP_FAT   | <a href="#">death</a>                                                 | RT |  | 5                      | 6.7E-1 | 1.0E0  |       |         |           |
| <input type="checkbox"/> | GOTERM_BP_FAT   | <a href="#">apoptosis</a>                                             | RT |  | 3                      | 9.0E-1 | 1.0E0  |       |         |           |
| <input type="checkbox"/> | GOTERM_BP_FAT   | <a href="#">programmed cell death</a>                                 | RT |  | 3                      | 9.0E-1 | 1.0E0  |       |         |           |
| Annotation Cluster 23    |                 |                                                                       |    |  | Enrichment Score: 0.73 |        |        | Count | P_Value | Benjamini |
| <input type="checkbox"/> | SP_PIR_KEYWORDS | <a href="#">calcium</a>                                               | RT |  | 11                     | 8.9E-3 | 8.9E-2 |       |         |           |
| <input type="checkbox"/> | GOTERM_MF_FAT   | <a href="#">calcium ion binding</a>                                   | RT |  | 13                     | 2.6E-2 | 5.5E-1 |       |         |           |
| <input type="checkbox"/> | GOTERM_MF_FAT   | <a href="#">cation binding</a>                                        | RT |  | 21                     | 9.9E-1 | 1.0E0  |       |         |           |
| <input type="checkbox"/> | GOTERM_MF_FAT   | <a href="#">ion binding</a>                                           | RT |  | 21                     | 9.9E-1 | 1.0E0  |       |         |           |
| <input type="checkbox"/> | GOTERM_MF_FAT   | <a href="#">metal ion binding</a>                                     | RT |  | 20                     | 9.9E-1 | 1.0E0  |       |         |           |
| Annotation Cluster 24    |                 |                                                                       |    |  | Enrichment Score: 0.64 |        |        | Count | P_Value | Benjamini |
| <input type="checkbox"/> | GOTERM_BP_FAT   | <a href="#">cellular homeostasis</a>                                  | RT |  | 7                      | 7.3E-2 | 6.9E-1 |       |         |           |
| <input type="checkbox"/> | GOTERM_BP_FAT   | <a href="#">cellular cation homeostasis</a>                           | RT |  | 5                      | 7.6E-2 | 7.0E-1 |       |         |           |
| <input type="checkbox"/> | GOTERM_BP_FAT   | <a href="#">cation homeostasis</a>                                    | RT |  | 5                      | 1.1E-1 | 7.7E-1 |       |         |           |
| <input type="checkbox"/> | GOTERM_BP_FAT   | <a href="#">cellular di-, tri-valent inorganic cation homeostasis</a> | RT |  | 4                      | 1.7E-1 | 8.8E-1 |       |         |           |
| <input type="checkbox"/> | GOTERM_BP_FAT   | <a href="#">di-, tri-valent inorganic cation homeostasis</a>          | RT |  | 4                      | 1.9E-1 | 8.9E-1 |       |         |           |

|                          |               |                                                  |    |  |   |        |        |
|--------------------------|---------------|--------------------------------------------------|----|--|---|--------|--------|
| <input type="checkbox"/> | GOTERM_BP_FAT | <a href="#">cellular ion homeostasis</a>         | RT |  | 5 | 2.1E-1 | 9.0E-1 |
| <input type="checkbox"/> | GOTERM_BP_FAT | <a href="#">cellular chemical homeostasis</a>    | RT |  | 5 | 2.2E-1 | 9.0E-1 |
| <input type="checkbox"/> | GOTERM_BP_FAT | <a href="#">membrane organization</a>            | RT |  | 5 | 2.2E-1 | 9.0E-1 |
| <input type="checkbox"/> | GOTERM_BP_FAT | <a href="#">ion homeostasis</a>                  | RT |  | 5 | 2.6E-1 | 9.3E-1 |
| <input type="checkbox"/> | GOTERM_BP_FAT | <a href="#">cellular calcium ion homeostasis</a> | RT |  | 3 | 3.2E-1 | 9.5E-1 |
| <input type="checkbox"/> | GOTERM_BP_FAT | <a href="#">calcium ion homeostasis</a>          | RT |  | 3 | 3.3E-1 | 9.6E-1 |
| <input type="checkbox"/> | GOTERM_BP_FAT | <a href="#">homeostatic process</a>              | RT |  | 7 | 3.3E-1 | 9.6E-1 |
| <input type="checkbox"/> | GOTERM_BP_FAT | <a href="#">cellular metal ion homeostasis</a>   | RT |  | 3 | 3.5E-1 | 9.6E-1 |
| <input type="checkbox"/> | GOTERM_BP_FAT | <a href="#">metal ion homeostasis</a>            | RT |  | 3 | 3.7E-1 | 9.7E-1 |
| <input type="checkbox"/> | GOTERM_BP_FAT | <a href="#">chemical homeostasis</a>             | RT |  | 5 | 4.0E-1 | 9.7E-1 |
| <input type="checkbox"/> | GOTERM_BP_FAT | <a href="#">cell proliferation</a>               | RT |  | 3 | 7.6E-1 | 1.0E0  |

| Annotation Cluster 25    |               | Enrichment Score: 0.61                               | G  |  | Count | P_Value | Benjamini |
|--------------------------|---------------|------------------------------------------------------|----|--|-------|---------|-----------|
| <input type="checkbox"/> | GOTERM_MF_FAT | <a href="#">vitamin binding</a>                      | RT |  | 3     | 2.3E-1  | 9.6E-1    |
| <input type="checkbox"/> | GOTERM_BP_FAT | <a href="#">carboxylic acid biosynthetic process</a> | RT |  | 3     | 2.5E-1  | 9.3E-1    |
| <input type="checkbox"/> | GOTERM_BP_FAT | <a href="#">organic acid biosynthetic process</a>    | RT |  | 3     | 2.5E-1  | 9.3E-1    |

| Annotation Cluster 26    |               | Enrichment Score: 0.6                                                      | G  |  | Count | P_Value | Benjamini |
|--------------------------|---------------|----------------------------------------------------------------------------|----|--|-------|---------|-----------|
| <input type="checkbox"/> | GOTERM_BP_FAT | <a href="#">positive regulation of molecular function</a>                  | RT |  | 10    | 1.1E-2  | 3.2E-1    |
| <input type="checkbox"/> | GOTERM_BP_FAT | <a href="#">positive regulation of catalytic activity</a>                  | RT |  | 9     | 1.6E-2  | 3.8E-1    |
| <input type="checkbox"/> | GOTERM_BP_FAT | <a href="#">positive regulation of ubiquitin-protein ligase activity</a>   | RT |  | 3     | 7.2E-2  | 6.9E-1    |
| <input type="checkbox"/> | GOTERM_BP_FAT | <a href="#">positive regulation of ligase activity</a>                     | RT |  | 3     | 7.7E-2  | 7.0E-1    |
| <input type="checkbox"/> | GOTERM_BP_FAT | <a href="#">regulation of ubiquitin-protein ligase activity</a>            | RT |  | 3     | 8.6E-2  | 7.2E-1    |
| <input type="checkbox"/> | GOTERM_BP_FAT | <a href="#">regulation of ligase activity</a>                              | RT |  | 3     | 9.2E-2  | 7.4E-1    |
| <input type="checkbox"/> | GOTERM_BP_FAT | <a href="#">positive regulation of protein ubiquitination</a>              | RT |  | 3     | 9.8E-2  | 7.5E-1    |
| <input type="checkbox"/> | GOTERM_BP_FAT | <a href="#">regulation of protein ubiquitination</a>                       | RT |  | 3     | 1.3E-1  | 8.2E-1    |
| <input type="checkbox"/> | GOTERM_BP_FAT | <a href="#">negative regulation of protein modification process</a>        | RT |  | 3     | 1.7E-1  | 8.7E-1    |
| <input type="checkbox"/> | GOTERM_BP_FAT | <a href="#">regulation of protein modification process</a>                 | RT |  | 4     | 2.8E-1  | 9.4E-1    |
| <input type="checkbox"/> | GOTERM_BP_FAT | <a href="#">negative regulation of cellular protein metabolic process</a>  | RT |  | 3     | 3.1E-1  | 9.5E-1    |
| <input type="checkbox"/> | GOTERM_BP_FAT | <a href="#">negative regulation of protein metabolic process</a>           | RT |  | 3     | 3.3E-1  | 9.6E-1    |
| <input type="checkbox"/> | GOTERM_BP_FAT | <a href="#">positive regulation of protein modification process</a>        | RT |  | 3     | 3.3E-1  | 9.6E-1    |
| <input type="checkbox"/> | GOTERM_BP_FAT | <a href="#">proteolysis</a>                                                | RT |  | 9     | 3.4E-1  | 9.6E-1    |
| <input type="checkbox"/> | GOTERM_BP_FAT | <a href="#">positive regulation of cellular protein metabolic process</a>  | RT |  | 3     | 4.3E-1  | 9.8E-1    |
| <input type="checkbox"/> | GOTERM_BP_FAT | <a href="#">positive regulation of protein metabolic process</a>           | RT |  | 3     | 4.5E-1  | 9.8E-1    |
| <input type="checkbox"/> | GOTERM_BP_FAT | <a href="#">cellular macromolecule catabolic process</a>                   | RT |  | 6     | 4.8E-1  | 9.9E-1    |
| <input type="checkbox"/> | GOTERM_BP_FAT | <a href="#">macromolecule catabolic process</a>                            | RT |  | 6     | 5.5E-1  | 9.9E-1    |
| <input type="checkbox"/> | GOTERM_BP_FAT | <a href="#">regulation of cellular protein metabolic process</a>           | RT |  | 4     | 5.8E-1  | 1.0E0     |
| <input type="checkbox"/> | GOTERM_BP_FAT | <a href="#">modification-dependent protein catabolic process</a>           | RT |  | 4     | 7.1E-1  | 1.0E0     |
| <input type="checkbox"/> | GOTERM_BP_FAT | <a href="#">modification-dependent macromolecule catabolic process</a>     | RT |  | 4     | 7.1E-1  | 1.0E0     |
| <input type="checkbox"/> | GOTERM_BP_FAT | <a href="#">proteolysis involved in cellular protein catabolic process</a> | RT |  | 4     | 7.3E-1  | 1.0E0     |
| <input type="checkbox"/> | GOTERM_BP_FAT | <a href="#">cellular protein catabolic process</a>                         | RT |  | 4     | 7.4E-1  | 1.0E0     |
| <input type="checkbox"/> | GOTERM_BP_FAT | <a href="#">protein catabolic process</a>                                  | RT |  | 4     | 7.6E-1  | 1.0E0     |
| <input type="checkbox"/> | GOTERM_BP_FAT | <a href="#">negative regulation of macromolecule metabolic process</a>     | RT |  | 4     | 8.5E-1  | 1.0E0     |
| <input type="checkbox"/> | GOTERM_BP_FAT | <a href="#">positive regulation of macromolecule metabolic process</a>     | RT |  | 3     | 9.7E-1  | 1.0E0     |

| Annotation Cluster 27    |                 | Enrichment Score: 0.59                                | G  |  | Count | P_Value | Benjamini |
|--------------------------|-----------------|-------------------------------------------------------|----|--|-------|---------|-----------|
| <input type="checkbox"/> | GOTERM_BP_FAT   | <a href="#">intracellular transport</a>               | RT |  | 9     | 5.4E-2  | 6.4E-1    |
| <input type="checkbox"/> | GOTERM_BP_FAT   | <a href="#">protein localization</a>                  | RT |  | 9     | 1.9E-1  | 8.9E-1    |
| <input type="checkbox"/> | GOTERM_BP_FAT   | <a href="#">protein transport</a>                     | RT |  | 8     | 2.0E-1  | 9.0E-1    |
| <input type="checkbox"/> | GOTERM_BP_FAT   | <a href="#">establishment of protein localization</a> | RT |  | 8     | 2.1E-1  | 9.0E-1    |
| <input type="checkbox"/> | GOTERM_BP_FAT   | <a href="#">cellular protein localization</a>         | RT |  | 5     | 2.6E-1  | 9.3E-1    |
| <input type="checkbox"/> | GOTERM_BP_FAT   | <a href="#">cellular macromolecule localization</a>   | RT |  | 5     | 2.6E-1  | 9.3E-1    |
| <input type="checkbox"/> | GOTERM_BP_FAT   | <a href="#">intracellular protein transport</a>       | RT |  | 4     | 4.2E-1  | 9.8E-1    |
| <input type="checkbox"/> | SP_PIR_KEYWORDS | <a href="#">protein transport</a>                     | RT |  | 4     | 4.6E-1  | 9.5E-1    |
| <input type="checkbox"/> | SP_PIR_KEYWORDS | <a href="#">transport</a>                             | RT |  | 6     | 9.4E-1  | 1.0E0     |

| Annotation Cluster 28 |  | Enrichment Score: 0.59 | G |  | Count | P_Value | Benjamini |
|-----------------------|--|------------------------|---|--|-------|---------|-----------|
|-----------------------|--|------------------------|---|--|-------|---------|-----------|



|                              |                 |                                                          |    |  |                               |          |        |              |                |                  |
|------------------------------|-----------------|----------------------------------------------------------|----|--|-------------------------------|----------|--------|--------------|----------------|------------------|
| <input type="checkbox"/>     | GOTERM_MF_FAT   | identical protein binding                                | RT |  | 9                             | 8.0E-2   | 8.7E-1 |              |                |                  |
| <input type="checkbox"/>     | GOTERM_MF_FAT   | protein homodimerization activity                        | RT |  | 4                             | 4.2E-1   | 9.9E-1 |              |                |                  |
| <input type="checkbox"/>     | GOTERM_MF_FAT   | protein dimerization activity                            | RT |  | 5                             | 5.3E-1   | 1.0E0  |              |                |                  |
| <b>Annotation Cluster 29</b> |                 |                                                          |    |  | <b>Enrichment Score: 0.57</b> | <b>G</b> |        | <b>Count</b> | <b>P_Value</b> | <b>Benjamini</b> |
| <input type="checkbox"/>     | GOTERM_BP_FAT   | positive regulation of I-kappaB kinase/NF-kappaB cascade | RT |  | 3                             | 1.2E-1   | 8.1E-1 |              |                |                  |
| <input type="checkbox"/>     | GOTERM_BP_FAT   | regulation of I-kappaB kinase/NF-kappaB cascade          | RT |  | 3                             | 1.5E-1   | 8.5E-1 |              |                |                  |
| <input type="checkbox"/>     | GOTERM_BP_FAT   | regulation of protein kinase cascade                     | RT |  | 4                             | 2.1E-1   | 9.0E-1 |              |                |                  |
| <input type="checkbox"/>     | GOTERM_BP_FAT   | positive regulation of protein kinase cascade            | RT |  | 3                             | 2.8E-1   | 9.4E-1 |              |                |                  |
| <input type="checkbox"/>     | GOTERM_BP_FAT   | positive regulation of signal transduction               | RT |  | 3                             | 5.6E-1   | 9.9E-1 |              |                |                  |
| <input type="checkbox"/>     | GOTERM_BP_FAT   | positive regulation of cell communication                | RT |  | 3                             | 6.2E-1   | 1.0E0  |              |                |                  |
| <b>Annotation Cluster 30</b> |                 |                                                          |    |  | <b>Enrichment Score: 0.57</b> | <b>G</b> |        | <b>Count</b> | <b>P_Value</b> | <b>Benjamini</b> |
| <input type="checkbox"/>     | GOTERM_BP_FAT   | activation of immune response                            | RT |  | 3                             | 1.2E-1   | 8.0E-1 |              |                |                  |
| <input type="checkbox"/>     | GOTERM_BP_FAT   | positive regulation of immune response                   | RT |  | 3                             | 2.3E-1   | 9.1E-1 |              |                |                  |
| <input type="checkbox"/>     | GOTERM_BP_FAT   | positive regulation of response to stimulus              | RT |  | 3                             | 4.4E-1   | 9.8E-1 |              |                |                  |
| <input type="checkbox"/>     | GOTERM_BP_FAT   | positive regulation of immune system process             | RT |  | 3                             | 4.4E-1   | 9.8E-1 |              |                |                  |
| <b>Annotation Cluster 31</b> |                 |                                                          |    |  | <b>Enrichment Score: 0.48</b> | <b>G</b> |        | <b>Count</b> | <b>P_Value</b> | <b>Benjamini</b> |
| <input type="checkbox"/>     | GOTERM_BP_FAT   | immune effector process                                  | RT |  | 3                             | 2.1E-1   | 9.0E-1 |              |                |                  |
| <input type="checkbox"/>     | GOTERM_BP_FAT   | innate immune response                                   | RT |  | 3                             | 2.2E-1   | 9.0E-1 |              |                |                  |
| <input type="checkbox"/>     | GOTERM_BP_FAT   | defense response                                         | RT |  | 6                             | 3.4E-1   | 9.6E-1 |              |                |                  |
| <input type="checkbox"/>     | GOTERM_BP_FAT   | immune response                                          | RT |  | 4                             | 8.2E-1   | 1.0E0  |              |                |                  |
| <b>Annotation Cluster 32</b> |                 |                                                          |    |  | <b>Enrichment Score: 0.44</b> | <b>G</b> |        | <b>Count</b> | <b>P_Value</b> | <b>Benjamini</b> |
| <input type="checkbox"/>     | SP_PIR_KEYWORDS | ATP                                                      | RT |  | 4                             | 1.2E-1   | 5.6E-1 |              |                |                  |
| <input type="checkbox"/>     | GOTERM_BP_FAT   | ATP metabolic process                                    | RT |  | 3                             | 1.4E-1   | 8.4E-1 |              |                |                  |
| <input type="checkbox"/>     | GOTERM_BP_FAT   | purine ribonucleoside triphosphate metabolic process     | RT |  | 3                             | 1.7E-1   | 8.7E-1 |              |                |                  |
| <input type="checkbox"/>     | GOTERM_BP_FAT   | ribonucleoside triphosphate metabolic process            | RT |  | 3                             | 1.7E-1   | 8.8E-1 |              |                |                  |
| <input type="checkbox"/>     | GOTERM_BP_FAT   | purine nucleoside triphosphate metabolic process         | RT |  | 3                             | 1.8E-1   | 8.8E-1 |              |                |                  |
| <input type="checkbox"/>     | GOTERM_BP_FAT   | nucleoside triphosphate metabolic process                | RT |  | 3                             | 2.0E-1   | 9.0E-1 |              |                |                  |
| <input type="checkbox"/>     | GOTERM_BP_FAT   | purine ribonucleotide metabolic process                  | RT |  | 3                             | 2.2E-1   | 9.0E-1 |              |                |                  |
| <input type="checkbox"/>     | GOTERM_CC_FAT   | mitochondrial matrix                                     | RT |  | 4                             | 2.2E-1   | 6.6E-1 |              |                |                  |
| <input type="checkbox"/>     | GOTERM_CC_FAT   | mitochondrial lumen                                      | RT |  | 4                             | 2.2E-1   | 6.6E-1 |              |                |                  |
| <input type="checkbox"/>     | GOTERM_BP_FAT   | ribonucleotide metabolic process                         | RT |  | 3                             | 2.4E-1   | 9.2E-1 |              |                |                  |
| <input type="checkbox"/>     | GOTERM_BP_FAT   | purine nucleotide metabolic process                      | RT |  | 3                             | 3.3E-1   | 9.6E-1 |              |                |                  |
| <input type="checkbox"/>     | SP_PIR_KEYWORDS | nucleotide-binding                                       | RT |  | 11                            | 3.8E-1   | 9.2E-1 |              |                |                  |
| <input type="checkbox"/>     | GOTERM_CC_FAT   | mitochondrial part                                       | RT |  | 6                             | 4.2E-1   | 8.8E-1 |              |                |                  |
| <input type="checkbox"/>     | SP_PIR_KEYWORDS | ligase                                                   | RT |  | 3                             | 4.7E-1   | 9.5E-1 |              |                |                  |
| <input type="checkbox"/>     | SP_PIR_KEYWORDS | atp-binding                                              | RT |  | 6                             | 8.3E-1   | 1.0E0  |              |                |                  |
| <input type="checkbox"/>     | UP_SEQ_FEATURE  | nucleotide phosphate-binding region:ATP                  | RT |  | 4                             | 8.9E-1   | 1.0E0  |              |                |                  |
| <input type="checkbox"/>     | GOTERM_MF_FAT   | ATP binding                                              | RT |  | 8                             | 9.1E-1   | 1.0E0  |              |                |                  |
| <input type="checkbox"/>     | GOTERM_MF_FAT   | adenyl ribonucleotide binding                            | RT |  | 8                             | 9.1E-1   | 1.0E0  |              |                |                  |
| <input type="checkbox"/>     | GOTERM_MF_FAT   | adenyl nucleotide binding                                | RT |  | 8                             | 9.4E-1   | 1.0E0  |              |                |                  |
| <input type="checkbox"/>     | GOTERM_MF_FAT   | purine nucleoside binding                                | RT |  | 8                             | 9.4E-1   | 1.0E0  |              |                |                  |
| <input type="checkbox"/>     | GOTERM_MF_FAT   | nucleoside binding                                       | RT |  | 8                             | 9.5E-1   | 1.0E0  |              |                |                  |
| <b>Annotation Cluster 33</b> |                 |                                                          |    |  | <b>Enrichment Score: 0.38</b> | <b>G</b> |        | <b>Count</b> | <b>P_Value</b> | <b>Benjamini</b> |
| <input type="checkbox"/>     | GOTERM_BP_FAT   | cellular component morphogenesis                         | RT |  | 5                             | 2.4E-1   | 9.2E-1 |              |                |                  |
| <input type="checkbox"/>     | GOTERM_BP_FAT   | cell morphogenesis involved in differentiation           | RT |  | 3                             | 4.6E-1   | 9.8E-1 |              |                |                  |
| <input type="checkbox"/>     | GOTERM_BP_FAT   | cell morphogenesis                                       | RT |  | 3                             | 6.6E-1   | 1.0E0  |              |                |                  |
| <b>Annotation Cluster 34</b> |                 |                                                          |    |  | <b>Enrichment Score: 0.36</b> | <b>G</b> |        | <b>Count</b> | <b>P_Value</b> | <b>Benjamini</b> |
| <input type="checkbox"/>     | GOTERM_BP_FAT   | response to organic substance                            | RT |  | 8                             | 1.7E-1   | 8.8E-1 |              |                |                  |
| <input type="checkbox"/>     | GOTERM_BP_FAT   | response to hormone stimulus                             | RT |  | 3                             | 6.8E-1   | 1.0E0  |              |                |                  |
| <input type="checkbox"/>     | GOTERM_BP_FAT   | response to endogenous stimulus                          | RT |  | 3                             | 7.3E-1   | 1.0E0  |              |                |                  |
| <b>Annotation Cluster 35</b> |                 |                                                          |    |  | <b>Enrichment Score: 0.35</b> | <b>G</b> |        | <b>Count</b> | <b>P_Value</b> | <b>Benjamini</b> |
| <input type="checkbox"/>     | GOTERM_BP_FAT   | cellular response to stress                              | RT |  | 8                             | 6.5E-2   | 6.8E-1 |              |                |                  |
| <input type="checkbox"/>     | GOTERM_BP_FAT   | regulation of apoptosis                                  | RT |  | 7                             | 3.9E-1   | 9.7E-1 |              |                |                  |
| <input type="checkbox"/>     | GOTERM_BP_FAT   | regulation of programmed cell death                      | RT |  | 7                             | 4.0E-1   | 9.7E-1 |              |                |                  |
| <input type="checkbox"/>     | GOTERM_BP_FAT   | regulation of cell death                                 | RT |  | 7                             | 4.1E-1   | 9.7E-1 |              |                |                  |
| <input type="checkbox"/>     | GOTERM_BP_FAT   | induction of apoptosis                                   | RT |  | 3                             | 6.0E-1   | 1.0E0  |              |                |                  |

|                                                            |                 |                                                                  |    |  |              |                |                  |
|------------------------------------------------------------|-----------------|------------------------------------------------------------------|----|--|--------------|----------------|------------------|
| <input type="checkbox"/>                                   | GOTERM_BP_FAT   | <a href="#">induction of programmed cell death</a>               | RT |  | 3            | 6.0E-1         | 1.0E0            |
| <input type="checkbox"/>                                   | GOTERM_BP_FAT   | <a href="#">positive regulation of apoptosis</a>                 | RT |  | 3            | 7.6E-1         | 1.0E0            |
| <input type="checkbox"/>                                   | GOTERM_BP_FAT   | <a href="#">positive regulation of programmed cell death</a>     | RT |  | 3            | 7.6E-1         | 1.0E0            |
| <input type="checkbox"/>                                   | GOTERM_BP_FAT   | <a href="#">positive regulation of cell death</a>                | RT |  | 3            | 7.6E-1         | 1.0E0            |
| <b>Annotation Cluster 36</b> <b>Enrichment Score: 0.32</b> |                 |                                                                  |    |  | <b>Count</b> | <b>P_Value</b> | <b>Benjamini</b> |
| <input type="checkbox"/>                                   | UP_SEQ_FEATURE  | nucleotide phosphate-binding region:GTP                          | RT |  | 5            | 6.9E-2         | 9.6E-1           |
| <input type="checkbox"/>                                   | SP_PIR_KEYWORDS | <a href="#">gtp-binding</a>                                      | RT |  | 5            | 9.3E-2         | 4.8E-1           |
| <input type="checkbox"/>                                   | GOTERM_MF_FAT   | <a href="#">GTPase activity</a>                                  | RT |  | 4            | 1.8E-1         | 9.4E-1           |
| <input type="checkbox"/>                                   | GOTERM_MF_FAT   | <a href="#">GTP binding</a>                                      | RT |  | 5            | 2.6E-1         | 9.7E-1           |
| <input type="checkbox"/>                                   | GOTERM_MF_FAT   | <a href="#">guanyl nucleotide binding</a>                        | RT |  | 5            | 2.8E-1         | 9.7E-1           |
| <input type="checkbox"/>                                   | GOTERM_MF_FAT   | <a href="#">guanyl ribonucleotide binding</a>                    | RT |  | 5            | 2.8E-1         | 9.7E-1           |
| <input type="checkbox"/>                                   | SP_PIR_KEYWORDS | <a href="#">nucleotide-binding</a>                               | RT |  | 11           | 3.8E-1         | 9.2E-1           |
| <input type="checkbox"/>                                   | GOTERM_MF_FAT   | <a href="#">ribonucleotide binding</a>                           | RT |  | 12           | 7.6E-1         | 1.0E0            |
| <input type="checkbox"/>                                   | GOTERM_MF_FAT   | <a href="#">purine ribonucleotide binding</a>                    | RT |  | 12           | 7.6E-1         | 1.0E0            |
| <input type="checkbox"/>                                   | GOTERM_MF_FAT   | <a href="#">purine nucleotide binding</a>                        | RT |  | 12           | 8.1E-1         | 1.0E0            |
| <input type="checkbox"/>                                   | GOTERM_MF_FAT   | <a href="#">nucleotide binding</a>                               | RT |  | 14           | 8.1E-1         | 1.0E0            |
| <input type="checkbox"/>                                   | SP_PIR_KEYWORDS | <a href="#">atp-binding</a>                                      | RT |  | 6            | 8.3E-1         | 1.0E0            |
| <input type="checkbox"/>                                   | UP_SEQ_FEATURE  | nucleotide phosphate-binding region:ATP                          | RT |  | 4            | 8.9E-1         | 1.0E0            |
| <input type="checkbox"/>                                   | GOTERM_MF_FAT   | <a href="#">ATP binding</a>                                      | RT |  | 8            | 9.1E-1         | 1.0E0            |
| <input type="checkbox"/>                                   | GOTERM_MF_FAT   | <a href="#">adenyl ribonucleotide binding</a>                    | RT |  | 8            | 9.1E-1         | 1.0E0            |
| <input type="checkbox"/>                                   | GOTERM_MF_FAT   | <a href="#">adenyl nucleotide binding</a>                        | RT |  | 8            | 9.4E-1         | 1.0E0            |
| <input type="checkbox"/>                                   | GOTERM_MF_FAT   | <a href="#">purine nucleoside binding</a>                        | RT |  | 8            | 9.4E-1         | 1.0E0            |
| <input type="checkbox"/>                                   | GOTERM_MF_FAT   | <a href="#">nucleoside binding</a>                               | RT |  | 8            | 9.5E-1         | 1.0E0            |
| <b>Annotation Cluster 37</b> <b>Enrichment Score: 0.31</b> |                 |                                                                  |    |  | <b>Count</b> | <b>P_Value</b> | <b>Benjamini</b> |
| <input type="checkbox"/>                                   | GOTERM_BP_FAT   | <a href="#">anti-apoptosis</a>                                   | RT |  | 3            | 3.7E-1         | 9.7E-1           |
| <input type="checkbox"/>                                   | GOTERM_BP_FAT   | <a href="#">regulation of apoptosis</a>                          | RT |  | 7            | 3.9E-1         | 9.7E-1           |
| <input type="checkbox"/>                                   | GOTERM_BP_FAT   | <a href="#">regulation of programmed cell death</a>              | RT |  | 7            | 4.0E-1         | 9.7E-1           |
| <input type="checkbox"/>                                   | GOTERM_BP_FAT   | <a href="#">regulation of cell death</a>                         | RT |  | 7            | 4.1E-1         | 9.7E-1           |
| <input type="checkbox"/>                                   | GOTERM_BP_FAT   | <a href="#">negative regulation of apoptosis</a>                 | RT |  | 3            | 6.6E-1         | 1.0E0            |
| <input type="checkbox"/>                                   | GOTERM_BP_FAT   | <a href="#">negative regulation of programmed cell death</a>     | RT |  | 3            | 6.6E-1         | 1.0E0            |
| <input type="checkbox"/>                                   | GOTERM_BP_FAT   | <a href="#">negative regulation of cell death</a>                | RT |  | 3            | 6.7E-1         | 1.0E0            |
| <b>Annotation Cluster 38</b> <b>Enrichment Score: 0.3</b>  |                 |                                                                  |    |  | <b>Count</b> | <b>P_Value</b> | <b>Benjamini</b> |
| <input type="checkbox"/>                                   | GOTERM_CC_FAT   | <a href="#">mitochondrion</a>                                    | RT |  | 13           | 8.4E-2         | 3.7E-1           |
| <input type="checkbox"/>                                   | GOTERM_CC_FAT   | <a href="#">mitochondrial part</a>                               | RT |  | 6            | 4.2E-1         | 8.8E-1           |
| <input type="checkbox"/>                                   | GOTERM_CC_FAT   | <a href="#">nuclear envelope</a>                                 | RT |  | 3            | 4.3E-1         | 8.9E-1           |
| <input type="checkbox"/>                                   | SP_PIR_KEYWORDS | <a href="#">mitochondrion</a>                                    | RT |  | 6            | 4.4E-1         | 9.4E-1           |
| <input type="checkbox"/>                                   | GOTERM_CC_FAT   | <a href="#">organelle envelope</a>                               | RT |  | 6            | 4.5E-1         | 9.0E-1           |
| <input type="checkbox"/>                                   | GOTERM_CC_FAT   | <a href="#">envelope</a>                                         | RT |  | 6            | 4.6E-1         | 9.0E-1           |
| <input type="checkbox"/>                                   | GOTERM_CC_FAT   | <a href="#">organelle inner membrane</a>                         | RT |  | 3            | 6.8E-1         | 9.8E-1           |
| <input type="checkbox"/>                                   | GOTERM_CC_FAT   | <a href="#">mitochondrial membrane</a>                           | RT |  | 3            | 7.8E-1         | 9.9E-1           |
| <input type="checkbox"/>                                   | GOTERM_CC_FAT   | <a href="#">mitochondrial envelope</a>                           | RT |  | 3            | 8.0E-1         | 9.9E-1           |
| <input type="checkbox"/>                                   | GOTERM_CC_FAT   | <a href="#">endomembrane system</a>                              | RT |  | 5            | 8.2E-1         | 1.0E0            |
| <input type="checkbox"/>                                   | GOTERM_CC_FAT   | <a href="#">organelle membrane</a>                               | RT |  | 5            | 9.6E-1         | 1.0E0            |
| <b>Annotation Cluster 39</b> <b>Enrichment Score: 0.14</b> |                 |                                                                  |    |  | <b>Count</b> | <b>P_Value</b> | <b>Benjamini</b> |
| <input type="checkbox"/>                                   | SP_PIR_KEYWORDS | <a href="#">iron</a>                                             | RT |  | 3            | 4.4E-1         | 9.4E-1           |
| <input type="checkbox"/>                                   | GOTERM_MF_FAT   | <a href="#">iron ion binding</a>                                 | RT |  | 3            | 6.4E-1         | 1.0E0            |
| <input type="checkbox"/>                                   | SP_PIR_KEYWORDS | <a href="#">metal-binding</a>                                    | RT |  | 7            | 1.0E0          | 1.0E0            |
| <input type="checkbox"/>                                   | GOTERM_MF_FAT   | <a href="#">transition metal ion binding</a>                     | RT |  | 8            | 1.0E0          | 1.0E0            |
| <b>Annotation Cluster 40</b> <b>Enrichment Score: 0.11</b> |                 |                                                                  |    |  | <b>Count</b> | <b>P_Value</b> | <b>Benjamini</b> |
| <input type="checkbox"/>                                   | GOTERM_BP_FAT   | <a href="#">gamete generation</a>                                | RT |  | 3            | 7.1E-1         | 1.0E0            |
| <input type="checkbox"/>                                   | GOTERM_BP_FAT   | <a href="#">sexual reproduction</a>                              | RT |  | 3            | 7.9E-1         | 1.0E0            |
| <input type="checkbox"/>                                   | GOTERM_BP_FAT   | <a href="#">reproductive process in a multicellular organism</a> | RT |  | 3            | 8.2E-1         | 1.0E0            |
| <input type="checkbox"/>                                   | GOTERM_BP_FAT   | <a href="#">multicellular organism reproduction</a>              | RT |  | 3            | 8.2E-1         | 1.0E0            |
| <b>Annotation Cluster 41</b> <b>Enrichment Score: 0.09</b> |                 |                                                                  |    |  | <b>Count</b> | <b>P_Value</b> | <b>Benjamini</b> |
| <input type="checkbox"/>                                   | GOTERM_BP_FAT   | <a href="#">macromolecular complex assembly</a>                  | RT |  | 4            | 8.0E-1         | 1.0E0            |
| <input type="checkbox"/>                                   | GOTERM_BP_FAT   | <a href="#">macromolecular complex subunit organization</a>      | RT |  | 4            | 8.3E-1         | 1.0E0            |
| <input type="checkbox"/>                                   | GOTERM_BP_FAT   | <a href="#">protein complex assembly</a>                         | RT |  | 3            | 8.3E-1         | 1.0E0            |
| <input type="checkbox"/>                                   | GOTERM_BP_FAT   | <a href="#">protein complex biogenesis</a>                       | RT |  | 2            | 9.2E-1         | 1.0E0            |



| Annotation Cluster 42    |                 | Enrichment Score: 0.02                       | <b>G</b>           |    | Count | P_Value | Benjamini |
|--------------------------|-----------------|----------------------------------------------|--------------------|-------------------------------------------------------------------------------------|-------|---------|-----------|
| <input type="checkbox"/> | GOTERM_BP_FAT   | <a href="#">protein complex biogenesis</a>   | <a href="#">RT</a> |      | 3     | 8.3E-1  | 1.0E0     |
| <input type="checkbox"/> | GOTERM_BP_FAT   | <a href="#">cognition</a>                    | <a href="#">RT</a> |      | 4     | 9.3E-1  | 1.0E0     |
| <input type="checkbox"/> | GOTERM_BP_FAT   | <a href="#">neurological system process</a>  | <a href="#">RT</a> |     | 5     | 9.5E-1  | 1.0E0     |
| <input type="checkbox"/> | GOTERM_BP_FAT   | <a href="#">sensory perception</a>           | <a href="#">RT</a> |    | 3     | 9.7E-1  | 1.0E0     |
| Annotation Cluster 43    |                 | Enrichment Score: 0.01                       | <b>G</b>           |  | Count | P_Value | Benjamini |
| <input type="checkbox"/> | GOTERM_BP_FAT   | <a href="#">phosphorylation</a>              | <a href="#">RT</a> |    | 3     | 9.6E-1  | 1.0E0     |
| <input type="checkbox"/> | GOTERM_BP_FAT   | <a href="#">phosphorus metabolic process</a> | <a href="#">RT</a> |    | 3     | 9.9E-1  | 1.0E0     |
| <input type="checkbox"/> | GOTERM_BP_FAT   | <a href="#">phosphate metabolic process</a>  | <a href="#">RT</a> |    | 3     | 9.9E-1  | 1.0E0     |
| Annotation Cluster 44    |                 | Enrichment Score: 0                          | <b>G</b>           |  | Count | P_Value | Benjamini |
| <input type="checkbox"/> | UP_SEQ_FEATURE  | <a href="#">transmembrane region</a>         | <a href="#">RT</a> |    | 3     | 1.0E0   | 1.0E0     |
| <input type="checkbox"/> | SP_PIR_KEYWORDS | <a href="#">transmembrane</a>                | <a href="#">RT</a> |    | 3     | 1.0E0   | 1.0E0     |
| <input type="checkbox"/> | GOTERM_CC_FAT   | <a href="#">integral to membrane</a>         | <a href="#">RT</a> |    | 7     | 1.0E0   | 1.0E0     |

87 terms were not clustered.

Please cite [Nature Protocols 2009; 4\(1\):44](#) & [Genome Biology 2003; 4\(5\):P3](#) within any publication that makes use of any methods inspired by **DAVID**.

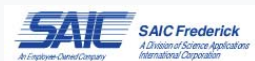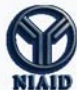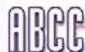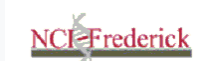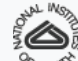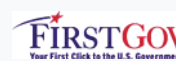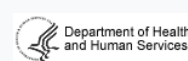

[Term of Service](#) | [Contact Us](#) | [Site Map](#)

## Functional Annotation Clustering

[Help and Manual](#)

Current Gene List: **Primed secretomes**

Current Background: **Homo sapiens**

83 DAVID IDs

Options    Classification Stringency

29 Cluster(s)

 [Download File](#)

| Annotation Cluster 1     |                 | Enrichment Score: 3.76                                                   | <b>G</b> |    | Count | P_Value | Benjamini |
|--------------------------|-----------------|--------------------------------------------------------------------------|----------|---------------------------------------------------------------------------------------|-------|---------|-----------|
| <input type="checkbox"/> | SP_PIR_KEYWORDS | <a href="#">acetylation</a>                                              | RT       |     | 24    | 1.2E-7  | 2.0E-5    |
| <input type="checkbox"/> | GOTERM_CC_FAT   | <a href="#">cytoskeleton</a>                                             | RT       |     | 15    | 3.9E-4  | 1.0E-2    |
| <input type="checkbox"/> | GOTERM_CC_FAT   | <a href="#">intracellular non-membrane-bounded organelle</a>             | RT       |     | 19    | 4.4E-3  | 6.7E-2    |
| <input type="checkbox"/> | GOTERM_CC_FAT   | <a href="#">non-membrane-bounded organelle</a>                           | RT       |     | 19    | 4.4E-3  | 6.7E-2    |
| Annotation Cluster 2     |                 | Enrichment Score: 3.46                                                   | <b>G</b> |    | Count | P_Value | Benjamini |
| <input type="checkbox"/> | GOTERM_CC_FAT   | <a href="#">extracellular region</a>                                     | RT       |     | 21    | 1.5E-5  | 2.3E-3    |
| <input type="checkbox"/> | SP_PIR_KEYWORDS | <a href="#">signal</a>                                                   | RT       |     | 23    | 2.0E-5  | 1.1E-3    |
| <input type="checkbox"/> | UP_SEQ_FEATURE  | <a href="#">signal peptide</a>                                           | RT       |     | 23    | 2.2E-5  | 5.2E-3    |
| <input type="checkbox"/> | SP_PIR_KEYWORDS | <a href="#">Secreted</a>                                                 | RT       |     | 16    | 3.4E-5  | 1.4E-3    |
| <input type="checkbox"/> | GOTERM_CC_FAT   | <a href="#">extracellular region part</a>                                | RT       |     | 14    | 3.6E-5  | 1.9E-3    |
| <input type="checkbox"/> | SP_PIR_KEYWORDS | <a href="#">glycoprotein</a>                                             | RT       |     | 22    | 3.7E-3  | 4.9E-2    |
| <input type="checkbox"/> | SP_PIR_KEYWORDS | <a href="#">disulfide bond</a>                                           | RT       |     | 16    | 1.1E-2  | 9.3E-2    |
| <input type="checkbox"/> | UP_SEQ_FEATURE  | <a href="#">glycosylation site:N-linked (GlcNAc...)</a>                  | RT       |     | 20    | 1.2E-2  | 7.6E-1    |
| <input type="checkbox"/> | UP_SEQ_FEATURE  | <a href="#">disulfide bond</a>                                           | RT       |     | 15    | 1.9E-2  | 7.7E-1    |
| Annotation Cluster 3     |                 | Enrichment Score: 3.1                                                    | <b>G</b> |  | Count | P_Value | Benjamini |
| <input type="checkbox"/> | SP_PIR_KEYWORDS | <a href="#">extracellular matrix</a>                                     | RT       |   | 9     | 2.9E-7  | 2.4E-5    |
| <input type="checkbox"/> | GOTERM_CC_FAT   | <a href="#">proteinaceous extracellular matrix</a>                       | RT       |   | 9     | 2.2E-5  | 1.7E-3    |
| <input type="checkbox"/> | GOTERM_CC_FAT   | <a href="#">extracellular matrix</a>                                     | RT       |   | 9     | 3.8E-5  | 1.5E-3    |
| <input type="checkbox"/> | SP_PIR_KEYWORDS | <a href="#">trimer</a>                                                   | RT       |   | 4     | 4.9E-5  | 1.6E-3    |
| <input type="checkbox"/> | GOTERM_BP_FAT   | <a href="#">collagen metabolic process</a>                               | RT       |   | 4     | 1.3E-4  | 7.9E-2    |
| <input type="checkbox"/> | SP_PIR_KEYWORDS | <a href="#">collagen</a>                                                 | RT       |   | 5     | 1.4E-4  | 3.7E-3    |
| <input type="checkbox"/> | GOTERM_BP_FAT   | <a href="#">multicellular organismal macromolecule metabolic process</a> | RT       |   | 4     | 1.8E-4  | 5.4E-2    |
| <input type="checkbox"/> | GOTERM_CC_FAT   | <a href="#">collagen</a>                                                 | RT       |   | 4     | 3.0E-4  | 9.3E-3    |
| <input type="checkbox"/> | GOTERM_BP_FAT   | <a href="#">multicellular organismal metabolic process</a>               | RT       |   | 4     | 3.0E-4  | 6.1E-2    |
| <input type="checkbox"/> | SP_PIR_KEYWORDS | <a href="#">Ehlers-Danlos syndrome</a>                                   | RT       |   | 3     | 4.0E-4  | 8.3E-3    |
| <input type="checkbox"/> | GOTERM_CC_FAT   | <a href="#">fibrillar collagen</a>                                       | RT       |   | 3     | 8.9E-4  | 2.0E-2    |
| <input type="checkbox"/> | GOTERM_CC_FAT   | <a href="#">extracellular matrix part</a>                                | RT       |   | 5     | 9.5E-4  | 1.8E-2    |
| <input type="checkbox"/> | INTERPRO        | <a href="#">Collagen triple helix repeat</a>                             | RT       |   | 4     | 2.2E-3  | 1.2E-1    |
| <input type="checkbox"/> | SP_PIR_KEYWORDS | <a href="#">triple helix</a>                                             | RT       |   | 3     | 3.3E-3  | 4.8E-2    |
| <input type="checkbox"/> | SP_PIR_KEYWORDS | <a href="#">hydroxylysine</a>                                            | RT       |   | 3     | 3.3E-3  | 4.8E-2    |
| <input type="checkbox"/> | GOTERM_MF_FAT   | <a href="#">extracellular matrix structural constituent</a>              | RT       |   | 4     | 3.5E-3  | 1.2E-1    |
| <input type="checkbox"/> | SP_PIR_KEYWORDS | <a href="#">hydroxyproline</a>                                           | RT       |   | 3     | 4.7E-3  | 5.8E-2    |
| <input type="checkbox"/> | GOTERM_BP_FAT   | <a href="#">collagen fibril organization</a>                             | RT       |   | 3     | 4.7E-3  | 3.1E-1    |
| <input type="checkbox"/> | GOTERM_BP_FAT   | <a href="#">extracellular matrix organization</a>                        | RT       |   | 4     | 5.9E-3  | 3.4E-1    |
| <input type="checkbox"/> | KEGG_PATHWAY    | <a href="#">ECM-receptor interaction</a>                                 | RT       |   | 4     | 6.1E-3  | 9.3E-2    |
| <input type="checkbox"/> | SP_PIR_KEYWORDS | <a href="#">hydroxylation</a>                                            | RT       |   | 3     | 1.6E-2  | 1.3E-1    |
| <input type="checkbox"/> | GOTERM_BP_FAT   | <a href="#">extracellular structure organization</a>                     | RT       |   | 4     | 2.0E-2  | 6.0E-1    |
| <input type="checkbox"/> | SP_PIR_KEYWORDS | <a href="#">coiled coil</a>                                              | RT       |   | 9     | 1.9E-1  | 6.5E-1    |
| Annotation Cluster 4     |                 | Enrichment Score: 3.06                                                   | <b>G</b> |  | Count | P_Value | Benjamini |
| <input type="checkbox"/> | SP_PIR_KEYWORDS | <a href="#">trimer</a>                                                   | RT       |   | 4     | 4.9E-5  | 1.6E-3    |
| <input type="checkbox"/> | UP_SEQ_FEATURE  | <a href="#">domain:TSP N-terminal</a>                                    | RT       |   | 3     | 1.8E-3  | 2.5E-1    |
| <input type="checkbox"/> | INTERPRO        | <a href="#">Laminin G, thrombospondin-type, N-terminal</a>               | RT       |   | 3     | 2.0E-3  | 1.6E-1    |
| <input type="checkbox"/> | SMART           | <a href="#">TSPN</a>                                                     | RT       |   | 3     | 3.2E-3  | 6.3E-2    |
| Annotation Cluster 5     |                 | Enrichment Score: 2.65                                                   | <b>G</b> |  | Count | P_Value | Benjamini |

|                                                            |                 |                                                         |    |  |              |                |                  |
|------------------------------------------------------------|-----------------|---------------------------------------------------------|----|--|--------------|----------------|------------------|
| <input type="checkbox"/>                                   | UP_SEQ_FEATURE  | domain:Hemopexin-like 2                                 | RT |  | 3            | 1.8E-3         | 2.5E-1           |
| <input type="checkbox"/>                                   | UP_SEQ_FEATURE  | domain:Hemopexin-like 1                                 | RT |  | 3            | 1.8E-3         | 2.5E-1           |
| <input type="checkbox"/>                                   | INTERPRO        | <a href="#">Hemopexin/matrixin_repeat</a>               | RT |  | 3            | 2.2E-3         | 9.2E-2           |
| <input type="checkbox"/>                                   | INTERPRO        | <a href="#">Hemopexin/matrixin_conserved_site</a>       | RT |  | 3            | 2.2E-3         | 9.2E-2           |
| <input type="checkbox"/>                                   | INTERPRO        | <a href="#">Hemopexin/matrixin</a>                      | RT |  | 3            | 2.2E-3         | 9.2E-2           |
| <input type="checkbox"/>                                   | SMART           | <a href="#">HX</a>                                      | RT |  | 3            | 3.5E-3         | 4.6E-2           |
| <b>Annotation Cluster 6</b> <b>Enrichment Score: 2.19</b>  |                 |                                                         |    |  | <b>Count</b> | <b>P_Value</b> | <b>Benjamini</b> |
| <input type="checkbox"/>                                   | GOTERM_MF_FAT   | <a href="#">polysaccharide binding</a>                  | RT |  | 5            | 2.1E-3         | 9.4E-2           |
| <input type="checkbox"/>                                   | GOTERM_MF_FAT   | <a href="#">pattern binding</a>                         | RT |  | 5            | 2.1E-3         | 9.4E-2           |
| <input type="checkbox"/>                                   | GOTERM_MF_FAT   | <a href="#">heparin binding</a>                         | RT |  | 4            | 5.7E-3         | 1.5E-1           |
| <input type="checkbox"/>                                   | KEGG_PATHWAY    | <a href="#">ECM-receptor interaction</a>                | RT |  | 4            | 6.1E-3         | 9.3E-2           |
| <input type="checkbox"/>                                   | GOTERM_MF_FAT   | <a href="#">glycosaminoglycan binding</a>               | RT |  | 4            | 1.3E-2         | 2.7E-1           |
| <input type="checkbox"/>                                   | GOTERM_MF_FAT   | <a href="#">carbohydrate binding</a>                    | RT |  | 5            | 3.6E-2         | 3.8E-1           |
| <b>Annotation Cluster 7</b> <b>Enrichment Score: 2.14</b>  |                 |                                                         |    |  | <b>Count</b> | <b>P_Value</b> | <b>Benjamini</b> |
| <input type="checkbox"/>                                   | UP_SEQ_FEATURE  | short sequence motif:Cell attachment site               | RT |  | 6            | 4.4E-6         | 2.1E-3           |
| <input type="checkbox"/>                                   | GOTERM_BP_FAT   | <a href="#">cell adhesion</a>                           | RT |  | 9            | 3.0E-3         | 3.1E-1           |
| <input type="checkbox"/>                                   | GOTERM_BP_FAT   | <a href="#">biological adhesion</a>                     | RT |  | 9            | 3.0E-3         | 2.7E-1           |
| <input type="checkbox"/>                                   | SP_PIR_KEYWORDS | <a href="#">cell adhesion</a>                           | RT |  | 6            | 6.0E-3         | 6.8E-2           |
| <input type="checkbox"/>                                   | INTERPRO        | <a href="#">EGF-like_type_3</a>                         | RT |  | 4            | 2.2E-2         | 5.3E-1           |
| <input type="checkbox"/>                                   | INTERPRO        | <a href="#">EGF-like</a>                                | RT |  | 4            | 2.4E-2         | 5.0E-1           |
| <input type="checkbox"/>                                   | SP_PIR_KEYWORDS | <a href="#">egf-like domain</a>                         | RT |  | 4            | 2.6E-2         | 1.8E-1           |
| <input type="checkbox"/>                                   | SMART           | <a href="#">EGF</a>                                     | RT |  | 4            | 4.2E-2         | 3.5E-1           |
| <input type="checkbox"/>                                   | INTERPRO        | <a href="#">EGF</a>                                     | RT |  | 3            | 5.8E-2         | 7.2E-1           |
| <input type="checkbox"/>                                   | INTERPRO        | <a href="#">EGF-like_region_conserved_site</a>          | RT |  | 4            | 6.0E-2         | 7.0E-1           |
| <b>Annotation Cluster 8</b> <b>Enrichment Score: 2.08</b>  |                 |                                                         |    |  | <b>Count</b> | <b>P_Value</b> | <b>Benjamini</b> |
| <input type="checkbox"/>                                   | KEGG_PATHWAY    | <a href="#">Focal adhesion</a>                          | RT |  | 8            | 1.9E-5         | 6.2E-4           |
| <input type="checkbox"/>                                   | GOTERM_BP_FAT   | <a href="#">actin filament-based process</a>            | RT |  | 6            | 1.6E-3         | 2.2E-1           |
| <input type="checkbox"/>                                   | SP_PIR_KEYWORDS | <a href="#">cytoskeleton</a>                            | RT |  | 7            | 7.8E-3         | 7.4E-2           |
| <input type="checkbox"/>                                   | GOTERM_BP_FAT   | <a href="#">actin cytoskeleton organization</a>         | RT |  | 5            | 8.3E-3         | 4.1E-1           |
| <input type="checkbox"/>                                   | GOTERM_BP_FAT   | <a href="#">maintenance of protein location in cell</a> | RT |  | 3            | 9.3E-3         | 4.2E-1           |
| <input type="checkbox"/>                                   | GOTERM_BP_FAT   | <a href="#">maintenance of location in cell</a>         | RT |  | 3            | 1.3E-2         | 4.9E-1           |
| <input type="checkbox"/>                                   | GOTERM_BP_FAT   | <a href="#">maintenance of protein location</a>         | RT |  | 3            | 1.3E-2         | 4.9E-1           |
| <input type="checkbox"/>                                   | GOTERM_BP_FAT   | <a href="#">cytoskeleton organization</a>               | RT |  | 6            | 1.9E-2         | 6.0E-1           |
| <input type="checkbox"/>                                   | GOTERM_BP_FAT   | <a href="#">maintenance of location</a>                 | RT |  | 3            | 2.2E-2         | 6.0E-1           |
| <input type="checkbox"/>                                   | GOTERM_MF_FAT   | <a href="#">actin binding</a>                           | RT |  | 5            | 2.8E-2         | 3.9E-1           |
| <input type="checkbox"/>                                   | SP_PIR_KEYWORDS | <a href="#">actin-binding</a>                           | RT |  | 4            | 3.1E-2         | 1.9E-1           |
| <input type="checkbox"/>                                   | GOTERM_MF_FAT   | <a href="#">cytoskeletal protein binding</a>            | RT |  | 5            | 1.0E-1         | 6.6E-1           |
| <b>Annotation Cluster 9</b> <b>Enrichment Score: 1.45</b>  |                 |                                                         |    |  | <b>Count</b> | <b>P_Value</b> | <b>Benjamini</b> |
| <input type="checkbox"/>                                   | GOTERM_MF_FAT   | <a href="#">calcium ion binding</a>                     | RT |  | 12           | 2.8E-4         | 2.0E-2           |
| <input type="checkbox"/>                                   | SP_PIR_KEYWORDS | <a href="#">calcium</a>                                 | RT |  | 10           | 3.1E-4         | 7.4E-3           |
| <input type="checkbox"/>                                   | GOTERM_MF_FAT   | <a href="#">metal ion binding</a>                       | RT |  | 13           | 8.4E-1         | 1.0E0            |
| <input type="checkbox"/>                                   | GOTERM_MF_FAT   | <a href="#">cation binding</a>                          | RT |  | 13           | 8.5E-1         | 1.0E0            |
| <input type="checkbox"/>                                   | GOTERM_MF_FAT   | <a href="#">ion binding</a>                             | RT |  | 13           | 8.7E-1         | 1.0E0            |
| <b>Annotation Cluster 10</b> <b>Enrichment Score: 1.37</b> |                 |                                                         |    |  | <b>Count</b> | <b>P_Value</b> | <b>Benjamini</b> |
| <input type="checkbox"/>                                   | UP_SEQ_FEATURE  | domain:EF-hand 2                                        | RT |  | 4            | 1.4E-2         | 7.3E-1           |
| <input type="checkbox"/>                                   | UP_SEQ_FEATURE  | domain:EF-hand 1                                        | RT |  | 4            | 1.4E-2         | 7.3E-1           |
| <input type="checkbox"/>                                   | INTERPRO        | <a href="#">EF-HAND_2</a>                               | RT |  | 4            | 2.8E-2         | 5.0E-1           |
| <input type="checkbox"/>                                   | INTERPRO        | <a href="#">Calcium-binding_EF-hand</a>                 | RT |  | 3            | 7.1E-2         | 7.2E-1           |
| <input type="checkbox"/>                                   | SMART           | <a href="#">EFh</a>                                     | RT |  | 3            | 1.0E-1         | 6.0E-1           |
| <input type="checkbox"/>                                   | INTERPRO        | <a href="#">EF-HAND_1</a>                               | RT |  | 3            | 1.4E-1         | 9.1E-1           |
| <b>Annotation Cluster 11</b> <b>Enrichment Score: 1.33</b> |                 |                                                         |    |  | <b>Count</b> | <b>P_Value</b> | <b>Benjamini</b> |
| <input type="checkbox"/>                                   | GOTERM_BP_FAT   | <a href="#">epidermis development</a>                   | RT |  | 4            | 2.7E-2         | 6.5E-1           |
| <input type="checkbox"/>                                   | SP_PIR_KEYWORDS | <a href="#">disease mutation</a>                        | RT |  | 10           | 2.9E-2         | 1.9E-1           |
| <input type="checkbox"/>                                   | GOTERM_BP_FAT   | <a href="#">ectoderm development</a>                    | RT |  | 4            | 3.3E-2         | 6.8E-1           |
| <input type="checkbox"/>                                   | SP_PIR_KEYWORDS | <a href="#">coiled coil</a>                             | RT |  | 9            | 1.9E-1         | 6.5E-1           |
| <b>Annotation Cluster 12</b> <b>Enrichment Score: 1</b>    |                 |                                                         |    |  | <b>Count</b> | <b>P_Value</b> | <b>Benjamini</b> |
| <input type="checkbox"/>                                   | GOTERM_CC_FAT   | <a href="#">pigment granule</a>                         | RT |  | 3            | 4.4E-2         | 3.9E-1           |
| <input type="checkbox"/>                                   | GOTERM_CC_FAT   | <a href="#">melanosome</a>                              | RT |  | 3            | 4.4E-2         | 3.9E-1           |
| <input type="checkbox"/>                                   | GOTERM_CC_FAT   |                                                         |    |  |              |                |                  |

|                                                                     |                 |                                                           |    |  |              |                |                  |
|---------------------------------------------------------------------|-----------------|-----------------------------------------------------------|----|--|--------------|----------------|------------------|
| <input type="checkbox"/>                                            |                 | cytoplasmic membrane-bounded vesicle                      | RT |  | 6            | 5.4E-2         | 4.4E-1           |
| <input type="checkbox"/>                                            | GOTERM_CC_FAT   | membrane-bounded vesicle                                  | RT |  | 6            | 6.1E-2         | 4.6E-1           |
| <input type="checkbox"/>                                            | GOTERM_CC_FAT   | cytoplasmic vesicle                                       | RT |  | 6            | 9.2E-2         | 5.7E-1           |
| <input type="checkbox"/>                                            | GOTERM_CC_FAT   | vesicle                                                   | RT |  | 6            | 1.1E-1         | 6.0E-1           |
| <input type="checkbox"/>                                            | GOTERM_CC_FAT   | secretory granule                                         | RT |  | 3            | 1.5E-1         | 6.9E-1           |
| <input type="checkbox"/>                                            | GOTERM_CC_FAT   | cytoplasmic vesicle part                                  | RT |  | 3            | 1.6E-1         | 6.8E-1           |
| <input type="checkbox"/>                                            | GOTERM_CC_FAT   | mitochondrion                                             | RT |  | 4            | 7.9E-1         | 1.0E0            |
| <b>Annotation Cluster 13</b> <b>Enrichment Score: 0.97</b> <b>G</b> |                 |                                                           |    |  | <b>Count</b> | <b>P_Value</b> | <b>Benjamini</b> |
| <input type="checkbox"/>                                            | GOTERM_MF_FAT   | RNA binding                                               | RT |  | 7            | 4.0E-2         | 3.8E-1           |
| <input type="checkbox"/>                                            | SP_PIR_KEYWORDS | protein biosynthesis                                      | RT |  | 3            | 9.5E-2         | 4.4E-1           |
| <input type="checkbox"/>                                            | GOTERM_BP_FAT   | translation                                               | RT |  | 3            | 3.3E-1         | 9.9E-1           |
| <b>Annotation Cluster 14</b> <b>Enrichment Score: 0.91</b> <b>G</b> |                 |                                                           |    |  | <b>Count</b> | <b>P_Value</b> | <b>Benjamini</b> |
| <input type="checkbox"/>                                            | GOTERM_BP_FAT   | negative regulation of protein metabolic process          | RT |  | 4            | 2.9E-2         | 6.4E-1           |
| <input type="checkbox"/>                                            | GOTERM_BP_FAT   | negative regulation of cellular protein metabolic process | RT |  | 3            | 1.3E-1         | 9.5E-1           |
| <input type="checkbox"/>                                            | GOTERM_BP_FAT   | regulation of cellular protein metabolic process          | RT |  | 4            | 2.4E-1         | 9.9E-1           |
| <input type="checkbox"/>                                            | GOTERM_BP_FAT   | negative regulation of macromolecule metabolic process    | RT |  | 5            | 2.6E-1         | 9.9E-1           |
| <b>Annotation Cluster 15</b> <b>Enrichment Score: 0.82</b> <b>G</b> |                 |                                                           |    |  | <b>Count</b> | <b>P_Value</b> | <b>Benjamini</b> |
| <input type="checkbox"/>                                            | GOTERM_MF_FAT   | protein kinase binding                                    | RT |  | 3            | 9.5E-2         | 6.6E-1           |
| <input type="checkbox"/>                                            | GOTERM_MF_FAT   | kinase binding                                            | RT |  | 3            | 1.3E-1         | 7.1E-1           |
| <input type="checkbox"/>                                            | GOTERM_MF_FAT   | enzyme binding                                            | RT |  | 4            | 2.8E-1         | 8.9E-1           |
| <b>Annotation Cluster 16</b> <b>Enrichment Score: 0.77</b> <b>G</b> |                 |                                                           |    |  | <b>Count</b> | <b>P_Value</b> | <b>Benjamini</b> |
| <input type="checkbox"/>                                            | SP_PIR_KEYWORDS | zymogen                                                   | RT |  | 4            | 1.9E-2         | 1.4E-1           |
| <input type="checkbox"/>                                            | GOTERM_CC_FAT   | extracellular space                                       | RT |  | 7            | 4.2E-2         | 4.0E-1           |
| <input type="checkbox"/>                                            | SP_PIR_KEYWORDS | metal-binding                                             | RT |  | 4            | 9.9E-1         | 1.0E0            |
| <input type="checkbox"/>                                            | GOTERM_MF_FAT   | transition metal ion binding                              | RT |  | 4            | 1.0E0          | 1.0E0            |
| <b>Annotation Cluster 17</b> <b>Enrichment Score: 0.77</b> <b>G</b> |                 |                                                           |    |  | <b>Count</b> | <b>P_Value</b> | <b>Benjamini</b> |
| <input type="checkbox"/>                                            | GOTERM_BP_FAT   | macromolecular complex assembly                           | RT |  | 6            | 8.5E-2         | 9.2E-1           |
| <input type="checkbox"/>                                            | GOTERM_BP_FAT   | protein complex biogenesis                                | RT |  | 5            | 1.0E-1         | 9.4E-1           |
| <input type="checkbox"/>                                            | GOTERM_BP_FAT   | protein complex assembly                                  | RT |  | 5            | 1.0E-1         | 9.4E-1           |
| <input type="checkbox"/>                                            | GOTERM_BP_FAT   | macromolecular complex subunit organization               | RT |  | 6            | 1.1E-1         | 9.3E-1           |
| <input type="checkbox"/>                                            | GOTERM_BP_FAT   | cellular macromolecular complex subunit organization      | RT |  | 4            | 1.3E-1         | 9.6E-1           |
| <input type="checkbox"/>                                            | GOTERM_BP_FAT   | cellular macromolecular complex assembly                  | RT |  | 3            | 3.1E-1         | 1.0E0            |
| <input type="checkbox"/>                                            | GOTERM_BP_FAT   | regulation of transcription                               | RT |  | 3            | 1.0E0          | 1.0E0            |
| <b>Annotation Cluster 18</b> <b>Enrichment Score: 0.69</b> <b>G</b> |                 |                                                           |    |  | <b>Count</b> | <b>P_Value</b> | <b>Benjamini</b> |
| <input type="checkbox"/>                                            | GOTERM_CC_FAT   | extracellular space                                       | RT |  | 7            | 4.2E-2         | 4.0E-1           |
| <input type="checkbox"/>                                            | GOTERM_BP_FAT   | response to endogenous stimulus                           | RT |  | 3            | 4.2E-1         | 1.0E0            |
| <input type="checkbox"/>                                            | GOTERM_BP_FAT   | response to organic substance                             | RT |  | 4            | 4.8E-1         | 1.0E0            |
| <b>Annotation Cluster 19</b> <b>Enrichment Score: 0.68</b> <b>G</b> |                 |                                                           |    |  | <b>Count</b> | <b>P_Value</b> | <b>Benjamini</b> |
| <input type="checkbox"/>                                            | GOTERM_BP_FAT   | sexual reproduction                                       | RT |  | 5            | 7.9E-2         | 9.2E-1           |
| <input type="checkbox"/>                                            | GOTERM_BP_FAT   | gamete generation                                         | RT |  | 4            | 1.6E-1         | 9.7E-1           |
| <input type="checkbox"/>                                            | GOTERM_BP_FAT   | reproductive developmental process                        | RT |  | 3            | 2.4E-1         | 9.9E-1           |
| <input type="checkbox"/>                                            | GOTERM_BP_FAT   | multicellular organism reproduction                       | RT |  | 4            | 2.5E-1         | 9.9E-1           |
| <input type="checkbox"/>                                            | GOTERM_BP_FAT   | reproductive process in a multicellular organism          | RT |  | 4            | 2.5E-1         | 9.9E-1           |
| <input type="checkbox"/>                                            | GOTERM_BP_FAT   | spermatogenesis                                           | RT |  | 3            | 3.0E-1         | 9.9E-1           |
| <input type="checkbox"/>                                            | GOTERM_BP_FAT   | male gamete generation                                    | RT |  | 3            | 3.0E-1         | 9.9E-1           |
| <b>Annotation Cluster 20</b> <b>Enrichment Score: 0.66</b> <b>G</b> |                 |                                                           |    |  | <b>Count</b> | <b>P_Value</b> | <b>Benjamini</b> |
| <input type="checkbox"/>                                            | GOTERM_BP_FAT   | Ras protein signal transduction                           | RT |  | 3            | 5.3E-2         | 8.3E-1           |
| <input type="checkbox"/>                                            | GOTERM_BP_FAT   | small GTPase mediated signal transduction                 | RT |  | 3            | 2.9E-1         | 9.9E-1           |
| <input type="checkbox"/>                                            | GOTERM_BP_FAT   | intracellular signaling cascade                           | RT |  | 5            | 6.6E-1         | 1.0E0            |
| <b>Annotation Cluster 21</b> <b>Enrichment Score: 0.64</b> <b>G</b> |                 |                                                           |    |  | <b>Count</b> | <b>P_Value</b> | <b>Benjamini</b> |
| <input type="checkbox"/>                                            | GOTERM_BP_FAT   | positive regulation of cellular component organization    | RT |  | 5            | 3.8E-3         | 2.9E-1           |
| <input type="checkbox"/>                                            | GOTERM_CC_FAT   | internal side of plasma membrane                          | RT |  | 4            | 1.2E-1         | 6.1E-1           |
| <input type="checkbox"/>                                            | GOTERM_CC_FAT   | plasma membrane part                                      | RT |  | 9            | 6.0E-1         | 9.9E-1           |
| <input type="checkbox"/>                                            | GOTERM_CC_FAT   | plasma membrane                                           | RT |  | 14           | 7.0E-1         | 9.9E-1           |
| <input type="checkbox"/>                                            | SP_PIR_KEYWORDS | cell membrane                                             | RT |  | 6            | 7.4E-1         | 1.0E0            |
| <input type="checkbox"/>                                            | SP_PIR_KEYWORDS | membrane                                                  | RT |  | 10           | 1.0E0          | 1.0E0            |

| Annotation Cluster 22    |                 | Enrichment Score: 0.63                                              |    |                                                                                     | G |       | Count | P_Value | Benjamini |
|--------------------------|-----------------|---------------------------------------------------------------------|----|-------------------------------------------------------------------------------------|---|---------------------------------------------------------------------------------------|-------|---------|-----------|
| <input type="checkbox"/> | UP_SEQ_FEATURE  | nucleotide phosphate-binding region:GTP                             | RT |      |   |                                                                                       | 4     | 4.8E-2  | 9.6E-1    |
| <input type="checkbox"/> | SP_PIR_KEYWORDS | <a href="#">gtp-binding</a>                                         | RT |      |   |                                                                                       | 4     | 6.2E-2  | 3.2E-1    |
| <input type="checkbox"/> | GOTERM_MF_FAT   | <a href="#">GTP binding</a>                                         | RT |     |   |                                                                                       | 4     | 1.4E-1  | 7.3E-1    |
| <input type="checkbox"/> | GOTERM_MF_FAT   | <a href="#">guanyl ribonucleotide binding</a>                       | RT |    |   |                                                                                       | 4     | 1.5E-1  | 7.3E-1    |
| <input type="checkbox"/> | GOTERM_MF_FAT   | <a href="#">guanyl nucleotide binding</a>                           | RT |    |   |                                                                                       | 4     | 1.5E-1  | 7.3E-1    |
| <input type="checkbox"/> | GOTERM_MF_FAT   | <a href="#">GTPase activity</a>                                     | RT |    |   |                                                                                       | 3     | 1.7E-1  | 7.5E-1    |
| <input type="checkbox"/> | SP_PIR_KEYWORDS | <a href="#">nucleotide-binding</a>                                  | RT |    |   |                                                                                       | 6     | 5.0E-1  | 9.6E-1    |
| <input type="checkbox"/> | GOTERM_MF_FAT   | <a href="#">purine nucleotide binding</a>                           | RT |    |   |                                                                                       | 8     | 5.3E-1  | 9.9E-1    |
| <input type="checkbox"/> | GOTERM_CC_FAT   | <a href="#">microtubule cytoskeleton</a>                            | RT |    |   |                                                                                       | 3     | 6.2E-1  | 9.9E-1    |
| <input type="checkbox"/> | GOTERM_MF_FAT   | <a href="#">purine ribonucleotide binding</a>                       | RT |    |   |                                                                                       | 7     | 6.5E-1  | 1.0E0     |
| <input type="checkbox"/> | GOTERM_MF_FAT   | <a href="#">ribonucleotide binding</a>                              | RT |    |   |                                                                                       | 7     | 6.5E-1  | 1.0E0     |
| Annotation Cluster 23    |                 | Enrichment Score: 0.54                                              |    |                                                                                     | G |    | Count | P_Value | Benjamini |
| <input type="checkbox"/> | GOTERM_MF_FAT   | <a href="#">RNA binding</a>                                         | RT |    |   |                                                                                       | 7     | 4.0E-2  | 3.8E-1    |
| <input type="checkbox"/> | SP_PIR_KEYWORDS | <a href="#">rna-binding</a>                                         | RT |    |   |                                                                                       | 5     | 6.1E-2  | 3.3E-1    |
| <input type="checkbox"/> | SP_PIR_KEYWORDS | <a href="#">ribonucleoprotein</a>                                   | RT |    |   |                                                                                       | 3     | 1.8E-1  | 6.4E-1    |
| <input type="checkbox"/> | GOTERM_CC_FAT   | <a href="#">organelle lumen</a>                                     | RT |    |   |                                                                                       | 10    | 2.4E-1  | 8.2E-1    |
| <input type="checkbox"/> | GOTERM_CC_FAT   | <a href="#">membrane-enclosed lumen</a>                             | RT |    |   |                                                                                       | 10    | 2.6E-1  | 8.3E-1    |
| <input type="checkbox"/> | GOTERM_CC_FAT   | <a href="#">nucleolus</a>                                           | RT |    |   |                                                                                       | 5     | 2.7E-1  | 8.2E-1    |
| <input type="checkbox"/> | GOTERM_CC_FAT   | <a href="#">ribonucleoprotein complex</a>                           | RT |    |   |                                                                                       | 4     | 3.0E-1  | 8.5E-1    |
| <input type="checkbox"/> | GOTERM_CC_FAT   | <a href="#">intracellular organelle lumen</a>                       | RT |    |   |                                                                                       | 8     | 5.1E-1  | 9.7E-1    |
| <input type="checkbox"/> | GOTERM_BP_FAT   | <a href="#">RNA processing</a>                                      | RT |    |   |                                                                                       | 3     | 5.8E-1  | 1.0E0     |
| <input type="checkbox"/> | GOTERM_CC_FAT   | <a href="#">nuclear lumen</a>                                       | RT |    |   |                                                                                       | 6     | 6.5E-1  | 9.9E-1    |
| <input type="checkbox"/> | GOTERM_CC_FAT   | <a href="#">nucleoplasm</a>                                         | RT |    |   |                                                                                       | 3     | 8.5E-1  | 1.0E0     |
| <input type="checkbox"/> | SP_PIR_KEYWORDS | <a href="#">nucleus</a>                                             | RT |    |   |                                                                                       | 9     | 9.3E-1  | 1.0E0     |
| Annotation Cluster 24    |                 | Enrichment Score: 0.52                                              |    |                                                                                     | G |    | Count | P_Value | Benjamini |
| <input type="checkbox"/> | GOTERM_BP_FAT   | <a href="#">intracellular transport</a>                             | RT |    |   |                                                                                       | 6     | 8.2E-2  | 9.2E-1    |
| <input type="checkbox"/> | GOTERM_BP_FAT   | <a href="#">protein targeting</a>                                   | RT |    |   |                                                                                       | 3     | 1.8E-1  | 9.8E-1    |
| <input type="checkbox"/> | GOTERM_BP_FAT   | <a href="#">cellular protein localization</a>                       | RT |   |   |                                                                                       | 4     | 1.8E-1  | 9.7E-1    |
| <input type="checkbox"/> | GOTERM_BP_FAT   | <a href="#">cellular macromolecule localization</a>                 | RT |  |   |                                                                                       | 4     | 1.8E-1  | 9.7E-1    |
| <input type="checkbox"/> | GOTERM_BP_FAT   | <a href="#">protein localization</a>                                | RT |  |   |                                                                                       | 6     | 2.0E-1  | 9.8E-1    |
| <input type="checkbox"/> | GOTERM_BP_FAT   | <a href="#">induction of apoptosis</a>                              | RT |  |   |                                                                                       | 3     | 3.1E-1  | 9.9E-1    |
| <input type="checkbox"/> | GOTERM_BP_FAT   | <a href="#">induction of programmed cell death</a>                  | RT |  |   |                                                                                       | 3     | 3.2E-1  | 9.9E-1    |
| <input type="checkbox"/> | GOTERM_BP_FAT   | <a href="#">regulation of apoptosis</a>                             | RT |  |   |                                                                                       | 5     | 3.2E-1  | 9.9E-1    |
| <input type="checkbox"/> | GOTERM_BP_FAT   | <a href="#">regulation of programmed cell death</a>                 | RT |  |   |                                                                                       | 5     | 3.3E-1  | 9.9E-1    |
| <input type="checkbox"/> | GOTERM_BP_FAT   | <a href="#">regulation of cell death</a>                            | RT |  |   |                                                                                       | 5     | 3.3E-1  | 9.9E-1    |
| <input type="checkbox"/> | GOTERM_BP_FAT   | <a href="#">intracellular protein transport</a>                     | RT |  |   |                                                                                       | 3     | 3.8E-1  | 1.0E0     |
| <input type="checkbox"/> | GOTERM_BP_FAT   | <a href="#">positive regulation of apoptosis</a>                    | RT |  |   |                                                                                       | 3     | 4.5E-1  | 1.0E0     |
| <input type="checkbox"/> | GOTERM_BP_FAT   | <a href="#">positive regulation of programmed cell death</a>        | RT |  |   |                                                                                       | 3     | 4.6E-1  | 1.0E0     |
| <input type="checkbox"/> | GOTERM_BP_FAT   | <a href="#">positive regulation of cell death</a>                   | RT |  |   |                                                                                       | 3     | 4.6E-1  | 1.0E0     |
| <input type="checkbox"/> | GOTERM_BP_FAT   | <a href="#">establishment of protein localization</a>               | RT |  |   |                                                                                       | 4     | 5.2E-1  | 1.0E0     |
| <input type="checkbox"/> | GOTERM_BP_FAT   | <a href="#">protein transport</a>                                   | RT |  |   |                                                                                       | 3     | 7.6E-1  | 1.0E0     |
| Annotation Cluster 25    |                 | Enrichment Score: 0.5                                               |    |                                                                                     | G |  | Count | P_Value | Benjamini |
| <input type="checkbox"/> | GOTERM_CC_FAT   | <a href="#">synapse part</a>                                        | RT |  |   |                                                                                       | 3     | 2.4E-1  | 8.3E-1    |
| <input type="checkbox"/> | UP_SEQ_FEATURE  | mutagenesis site                                                    | RT |  |   |                                                                                       | 8     | 3.4E-1  | 1.0E0     |
| <input type="checkbox"/> | GOTERM_CC_FAT   | <a href="#">synapse</a>                                             | RT |  |   |                                                                                       | 3     | 3.9E-1  | 9.1E-1    |
| Annotation Cluster 26    |                 | Enrichment Score: 0.46                                              |    |                                                                                     | G |  | Count | P_Value | Benjamini |
| <input type="checkbox"/> | SP_PIR_KEYWORDS | <a href="#">zymogen</a>                                             | RT |  |   |                                                                                       | 4     | 1.9E-2  | 1.4E-1    |
| <input type="checkbox"/> | GOTERM_MF_FAT   | <a href="#">endopeptidase activity</a>                              | RT |  |   |                                                                                       | 3     | 3.9E-1  | 9.6E-1    |
| <input type="checkbox"/> | SP_PIR_KEYWORDS | <a href="#">Protease</a>                                            | RT |  |   |                                                                                       | 3     | 3.9E-1  | 9.1E-1    |
| <input type="checkbox"/> | GOTERM_MF_FAT   | <a href="#">peptidase activity, acting on L-amino acid peptides</a> | RT |  |   |                                                                                       | 3     | 5.9E-1  | 9.9E-1    |
| <input type="checkbox"/> | GOTERM_MF_FAT   | <a href="#">peptidase activity</a>                                  | RT |  |   |                                                                                       | 3     | 6.1E-1  | 9.9E-1    |
| <input type="checkbox"/> | GOTERM_BP_FAT   | <a href="#">proteolysis</a>                                         | RT |  |   |                                                                                       | 4     | 7.3E-1  | 1.0E0     |
| <input type="checkbox"/> | SP_PIR_KEYWORDS | <a href="#">hydrolase</a>                                           | RT |  |   |                                                                                       | 4     | 8.1E-1  | 1.0E0     |
| Annotation Cluster 27    |                 | Enrichment Score: 0.16                                              |    |                                                                                     | G |  | Count | P_Value | Benjamini |
| <input type="checkbox"/> | GOTERM_MF_FAT   | <a href="#">nucleotide binding</a>                                  | RT |  |   |                                                                                       | 11    | 2.6E-1  | 8.9E-1    |
| <input type="checkbox"/> | SP_PIR_KEYWORDS | <a href="#">nucleotide-binding</a>                                  | RT |  |   |                                                                                       | 6     | 5.0E-1  | 9.6E-1    |
| <input type="checkbox"/> | GOTERM_MF_FAT   | <a href="#">purine nucleotide binding</a>                           | RT |  |   |                                                                                       | 8     | 5.3E-1  | 9.9E-1    |

|                              |                 |                                               |                    |  |                               |          |       |
|------------------------------|-----------------|-----------------------------------------------|--------------------|--|-------------------------------|----------|-------|
| <input type="checkbox"/>     | GOTERM_MF_FAT   | <a href="#">purine ribonucleotide binding</a> | <a href="#">RT</a> |  | 7                             | 6.5E-1   | 1.0E0 |
| <input type="checkbox"/>     | GOTERM_MF_FAT   | <a href="#">ribonucleotide binding</a>        | <a href="#">RT</a> |  | 7                             | 6.5E-1   | 1.0E0 |
| <input type="checkbox"/>     | GOTERM_BP_FAT   | <a href="#">cell cycle</a>                    | <a href="#">RT</a> |  | 3                             | 7.7E-1   | 1.0E0 |
| <input type="checkbox"/>     | GOTERM_MF_FAT   | <a href="#">adenyl nucleotide binding</a>     | <a href="#">RT</a> |  | 4                             | 9.3E-1   | 1.0E0 |
| <input type="checkbox"/>     | GOTERM_MF_FAT   | <a href="#">purine nucleoside binding</a>     | <a href="#">RT</a> |  | 4                             | 9.3E-1   | 1.0E0 |
| <input type="checkbox"/>     | GOTERM_MF_FAT   | <a href="#">nucleoside binding</a>            | <a href="#">RT</a> |  | 4                             | 9.4E-1   | 1.0E0 |
| <input type="checkbox"/>     | GOTERM_MF_FAT   | <a href="#">ATP binding</a>                   | <a href="#">RT</a> |  | 3                             | 9.7E-1   | 1.0E0 |
| <input type="checkbox"/>     | GOTERM_MF_FAT   | <a href="#">adenyl ribonucleotide binding</a> | <a href="#">RT</a> |  | 3                             | 9.8E-1   | 1.0E0 |
| <b>Annotation Cluster 28</b> |                 |                                               |                    |  | <b>Enrichment Score: 0.09</b> | <b>G</b> |       |
| <input type="checkbox"/>     | GOTERM_CC_FAT   | <a href="#">cell fraction</a>                 | <a href="#">RT</a> |  | 4                             | 7.8E-1   | 1.0E0 |
| <input type="checkbox"/>     | GOTERM_CC_FAT   | <a href="#">membrane fraction</a>             | <a href="#">RT</a> |  | 3                             | 8.2E-1   | 1.0E0 |
| <input type="checkbox"/>     | GOTERM_CC_FAT   | <a href="#">insoluble fraction</a>            | <a href="#">RT</a> |  | 3                             | 8.3E-1   | 1.0E0 |
| <b>Annotation Cluster 29</b> |                 |                                               |                    |  | <b>Enrichment Score: 0</b>    | <b>G</b> |       |
| <input type="checkbox"/>     | UP_SEQ_FEATURE  | topological domain: Cytoplasmic               | <a href="#">RT</a> |  | 3                             | 1.0E0    | 1.0E0 |
| <input type="checkbox"/>     | UP_SEQ_FEATURE  | transmembrane region                          | <a href="#">RT</a> |  | 3                             | 1.0E0    | 1.0E0 |
| <input type="checkbox"/>     | SP_PIR_KEYWORDS | <a href="#">transmembrane</a>                 | <a href="#">RT</a> |  | 3                             | 1.0E0    | 1.0E0 |
| <input type="checkbox"/>     | GOTERM_CC_FAT   | <a href="#">intrinsic to membrane</a>         | <a href="#">RT</a> |  | 6                             | 1.0E0    | 1.0E0 |
| <input type="checkbox"/>     | GOTERM_CC_FAT   | <a href="#">integral to membrane</a>          | <a href="#">RT</a> |  | 5                             | 1.0E0    | 1.0E0 |

50 terms were not clustered.

Please cite [Nature Protocols 2009; 4\(1\):44](#) & [Genome Biology 2003; 4\(5\):P3](#) within any publication that makes use of any methods inspired by DAVID.

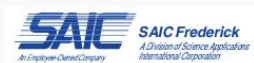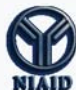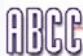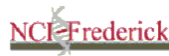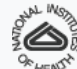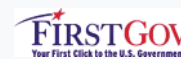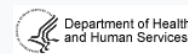

[Term of Service](#) | [Contact Us](#) | [Site Map](#)
